1 Association mapping and haplotype analysis of the pre-  
2 harvest sprouting resistance locus *Phs-A1* reveals a causal  
3 role of *TaMKK3-A* in global germplasm  
4

5

6 Oluwaseyi Shorinola<sup>1</sup>, Barbara Balcárková<sup>2</sup>, Jessica Hyles<sup>3</sup>, Josquin F. G. Tibbits<sup>4</sup>,  
7 Matthew J. Hayden<sup>4</sup>, Katarina Holuřova<sup>2</sup>, Miroslav Valárik<sup>2</sup>, Assaf Distelfeld<sup>5</sup>,  
8 Atsushi Torada<sup>6</sup>, Jose M. Barrero<sup>3</sup> and Cristobal Uauy<sup>1\*</sup>  
9

10

11

12 <sup>1</sup> John Innes Centre, Norwich Research Park, NR4 7UH, UK.

13 <sup>2</sup> Institute of Experimental Botany, Centre of the Region Haná for Biotechnological  
14 and Agricultural Research, Olomouc, 783 71, Czech Rep.

15 <sup>3</sup> Commonwealth Scientific and Industrial Research Organisation (CSIRO),  
16 Canberra, ACT, 2601, Australia.

17 <sup>4</sup> Department of Economic Development, Jobs, Transport and Resources, Centre for  
18 AgriBioscience, 5 Ring Road, Bundoora, Victoria, 3083, Australia.

19 <sup>5</sup> The Institute for Cereal Crop Improvement, Tel Aviv University, Tel Aviv, Israel.

20 <sup>6</sup> HOKUREN Agricultural Research Institute, Naganuma, Hokkaido 069-1317,  
21 Japan.  
22

23

24 OS: [oluwaseyi.shorinola@jic.ac.uk](mailto:oluwaseyi.shorinola@jic.ac.uk)

25 BB: [balcarkova.bara@seznam.cz](mailto:balcarkova.bara@seznam.cz)

26 JH: [jessica.hyles@csiro.au](mailto:jessica.hyles@csiro.au)

27 JFGT: [josquin.tibbits@ecodev.vic.gov.au](mailto:josquin.tibbits@ecodev.vic.gov.au)

28 MJH: [matthew.hayden@ecodev.vic.gov.au](mailto:matthew.hayden@ecodev.vic.gov.au)

29 KH: [holusovak@ueb.cas.cz](mailto:holusovak@ueb.cas.cz)

30 MV: [valarik@ueb.cas.cz](mailto:valarik@ueb.cas.cz)

31 AD: [adistel@post.tau.ac.il](mailto:adistel@post.tau.ac.il)

32 AT: [torada-atusi@hokuren.jp](mailto:torada-atusi@hokuren.jp)

33 JMB: [Jose.Barrero@csiro.au](mailto:Jose.Barrero@csiro.au)

34 CU: [cristobal.uauy@jic.ac.uk](mailto:cristobal.uauy@jic.ac.uk)  
35

36

36 \* Corresponding author: Cristobal Uauy ([cristobal.uauy@jic.ac.uk](mailto:cristobal.uauy@jic.ac.uk))

37 Phone: +44-(0)1603-450195  
38

39

39 Number of words: 5,493

40 Number of figures: Five main figures and five supplementary figures.  
41

41

## 42 **Abstract**

43 Pre-harvest sprouting (PHS) is an important cause of quality loss in many cereal crops  
44 and is particularly prevalent and damaging in wheat. Resistance to PHS is therefore a  
45 valuable target trait in many breeding programmes. The *Phs-A1* locus on wheat  
46 chromosome arm 4AL has been consistently shown to account for a significant  
47 proportion of natural variation to PHS in diverse mapping populations. However the  
48 deployment of sprouting resistance is confounded by the fact that different candidate  
49 genes, including the tandem duplicated *Plasma Membrane 19 (PM19)* genes and the  
50 *mitogen-activated protein kinase kinase 3 (TaMKK3-A)* gene, have been proposed to  
51 underlie *Phs-A1*. To further define the *Phs-A1* locus, we constructed a physical map  
52 across this interval in hexaploid and tetraploid wheat. We established close proximity  
53 of the proposed candidate genes which are located within a 1.2 Mb interval. An  
54 association analysis of diverse germplasm used in previous genetic mapping studies  
55 suggests that *TaMKK3-A*, and not *PM19*, is the major gene underlying the *Phs-A1*  
56 effect in European, North American, Australian and Asian germplasm. We identified  
57 the non-dormant *TaMKK3-A* allele at low frequencies within the A-genome diploid  
58 progenitor *Triticum urartu* genepool, and show an increase in the allele frequency in  
59 modern varieties. In UK varieties, the frequency of the dormant *TaMKK3-A* allele was  
60 significantly higher in bread-making quality varieties compared to feed and biscuit-  
61 making cultivars. Analysis of exome capture data from 58 diverse hexaploid wheat  
62 accessions identified fourteen haplotypes across the extended *Phs-A1* locus and four  
63 haplotypes for *TaMKK3-A*. Analysis of these haplotypes in a collection of UK and  
64 Australian cultivars revealed distinct major dormant and non-dormant *Phs-A1*  
65 haplotypes in each country, which were either rare or absent in the opposing  
66 germplasm set. The diagnostic markers and haplotype information reported in the  
67 study will help inform the choice of germplasm and breeding strategies for the  
68 deployment of *Phs-A1* resistance into breeding germplasm.

69

70 **Keywords:** Dormancy, seed, *PM19*, *TaMKK3-A*, pre-harvest sprouting, *Triticum*  
71 *aestivum*, haplotype

## 72 **Introduction**

73 Pre-harvest sprouting (PHS) refers to the too-early germination of physiologically  
74 matured grains while still on the ear, but before harvest. PHS is primarily caused by  
75 insufficient levels, or rapid loss, of seed dormancy and is an important cause of quality  
76 loss in many cereal crops (Li et al., 2004; Fang and Chu, 2008). This is particularly  
77 relevant in wheat due to its detrimental effects on bread-making potential which  
78 represents the most common use of wheat grains globally (Simsek et al., 2014). PHS  
79 is believed to be a modern phenomenon, as progenitor and wild wheat species  
80 generally display high levels of seed dormancy (Gatford et al., 2002; Lan et al., 2005).  
81 Selection for reduced seed dormancy during domestication and modern breeding  
82 programmes allowed for more uniform seed germination and rapid crop establishment  
83 (Nave et al., 2016). However, this also resulted in higher level of susceptibility to PHS  
84 in modern wheat varieties (Barrero et al., 2010). In addition to its detrimental effect  
85 on quality, PHS also reduces yield and affects seed viability, making resistance to PHS  
86 a high priority in many breeding programmes.

87

88 Occurrence of PHS is heavily influenced by the environment. PHS is prevalent in  
89 wheat growing regions with high levels of rainfall during the period of grain

90 maturation and after-ripening. Increased ambient temperature during this period can  
91 further increase the susceptibility of grains to sprouting (Barnard and Smith, 2009;  
92 Mares and Mrva, 2014). This environmental dependency of PHS constitutes a  
93 constraint in selecting for PHS resistance in field conditions. In addition, resistance to  
94 PHS is highly quantitative and is controlled by numerous quantitative trait loci (QTL)  
95 located on all 21 chromosomes of bread wheat (Flintham et al., 2002; Kulwal et al.,  
96 2005; Mori et al., 2005; Kottarachchi et al., 2006; Ogbonnaya et al., 2007; Liu et al.,  
97 2008; Torada et al., 2008; Xiao-bo et al., 2008; Mohan et al., 2009; Munkvold et al.,  
98 2009; Knox et al., 2012; Kulwal et al., 2012; Gao et al., 2013; Lohwasser et al., 2013;  
99 Mares and Mrva, 2014; Kumar et al., 2015). This makes resistance to PHS one of the  
100 most multi-genic traits in wheat and further highlights the complexity in breeding for  
101 this trait.

102

103 Despite the multi-genic control of PHS resistance, a locus on chromosome arm 4AL,  
104 designated as *Phs-A1*, has been consistently shown to account for a significant  
105 proportion of natural variation to sprouting in diverse mapping populations. The *Phs-*  
106 *A1* effect has been identified in at least eleven bi-parental and multi-parent mapping  
107 populations derived from diverse germplasm from Australia, UK, Japan, China,  
108 Mexico, Canada and Europe (Torada et al., 2005; Ogbonnaya et al., 2007; Chen et al.,  
109 2008; Torada et al., 2008; Cabral et al., 2014; Albrecht et al., 2015; Barrero et al.,  
110 2015). Physiological evaluation of *Phs-A1* shows that it delays the rate of dormancy  
111 loss during seed after-ripening when plants are grown across a wide range of  
112 temperatures (13 °C – 22 °C; Shorinola et al., 2016).

113

114 Recently, two independent studies by Barrero et al. (2015) and Torada et al. (2016)  
115 identified the tandem duplicated *Plasma Membrane 19 (PM19-A1 and PM19-A2)*  
116 genes and a *mitogen-activated protein kinase kinase 3 (TaMKK3-A)* gene,  
117 respectively, as candidates for *Phs-A1*. The *PM19* genes were identified through a  
118 combined genetic approach using multi-parent mapping populations and  
119 transcriptomic analysis of near-isogenic recombinant inbred lines. The *TaMKK3-A*  
120 gene was identified through a more traditional positional cloning strategy using bi-  
121 parental mapping populations. Each study confirmed the effect of the gene(s) on  
122 dormancy through either down-regulation of transcript levels through RNA  
123 interference (*PM19*) or transgenic complementation of the susceptible parent with the  
124 resistant allele (*TaMKK3-A*).

125

126 It is presently unclear whether the sprouting variation associated with *Phs-A1* across  
127 diverse germplasm is due to allelic variation at *PM19* or *TaMKK3-A* alone, or if it's  
128 due to a combination of both genes (Torada et al 2016). Fine-mapping studies  
129 (Shorinola et al., 2016) defined *Phs-A1* to a genetic interval distal to *PM19* for UK  
130 germplasm, consistent with the position of *TaMKK3-A*. However, a comprehensive  
131 understanding of *Phs-A1* diversity taking into account both *PM19* and *TaMKK3-A*  
132 genes across a wider set of germplasm is lacking.

133

134 In this study, we characterised the *Phs-A1* physical interval in both hexaploid and  
135 tetraploid emmer wheat to establish the physical proximity of *PM19* and *TaMKK3-A*.  
136 We developed markers for the candidate genes, and showed *TaMKK3-A* alleles to be  
137 diagnostic for sprouting resistance in a panel of parental lines from mapping  
138 populations in which *Phs-A1* was identified. We used diploid, tetraploid and hexaploid  
139 accessions to further trace the origin of the sprouting susceptible *TaMKK3-A* allele

140 and used exome capture data from the wheat HapMap panel (Jordan et al., 2015) to  
141 examine the haplotype variation across the *Phs-A1* locus.

142

## 143 **Materials and Methods**

144

### 145 **Physical Map Sequence Assembly and Annotation**

146 A fingerprinted Bacterial Artificial Chromosome (BAC) library of flow-sorted 4A  
147 chromosome was used for constructing the Chinese Spring *Phs-A1* physical map  
148 (accessible at [https://urgi.versailles.inra.fr/gb2/gbrowse/wheat\\_phys\\_4AL\\_v2/](https://urgi.versailles.inra.fr/gb2/gbrowse/wheat_phys_4AL_v2/)).  
149 Using the high-throughput BAC screening approach described by Cvikova et al.  
150 (2015), a sequence database made from three-dimensional pool of BAC clones  
151 comprising the Minimum Tilling Path (MTP) was searched for the sequences of  
152 *PM19-A1* and *TaMKK3-A*. This identified two positive clones for *PM19-A1*  
153 (TaaCsp4AL037H11 and TaaCsp4AL172K12) and three positive clones for  
154 *TaMKK3-A* (TaaCsp4AL032F12, TaaCsp4AL012P14 and TaaCsp4AL002F16; Table  
155 S1). Using Linear Topology Contig (LTC; Frenkel et al., 2010) BAC clustering  
156 information for this library, we identified the BAC clusters (defined as a network of  
157 overlapping BACs forming a contiguous sequence) to which these BACs belong. The  
158 *PM19-A1*-containing BACs belong to BAC Cluster 16421 which has 20 BACs in its  
159 MTP while the *TaMKK3-A*-containing BACs belong to BAC Cluster 285 comprised  
160 of four MTP BACs (Table S1).

161

162 DNA of the BACs was extracted using the Qiagen Plasmid Midi Kit (Qiagen, Cat. No.  
163 12143). Eleven of the 20 MTP BACs of Cluster 16421 and the four BACs of Cluster  
164 285 MTP were sequenced on the Illumina MiSeq with 250 bp paired-end reads. An  
165 average of 2,105,488 and 2,752,220 paired-end reads per BAC were produced for  
166 Cluster 16421 and 285 BACs, respectively. Illumina reads for each BAC were  
167 separately assembled using the CLC Bio genomic software ([www.clcbio.com](http://www.clcbio.com)). Before  
168 assembly, reads were filtered to remove contaminant sequences by mapping to the  
169 BAC vector (pIndigoBAC-5) sequence and the *Escherichia coli* genome. *De novo*  
170 assembly of reads after contaminant removal was done with the following assembly  
171 parameters: Word size: 64 bp; Bubble size: 250 bp; Mismatch cost: 2; Insertion cost:  
172 3; Deletion cost 3; Length fraction: 90%; Similarity fraction: 95%.

173

174 The assembled contigs were repeat-masked by BLASTn analysis against the Triticeae  
175 Repeat Element Database (TREP: [wheat.pw.usda.gov/ITMI/Repeats](http://wheat.pw.usda.gov/ITMI/Repeats); Wicker et al.,  
176 2000). Gene annotation was performed using the wheat gene models described by  
177 Krasileva et al. (2013) and by BLASTX analysis to NCBI nr  
178 ([blast.ncbi.nlm.nih.gov/Blast](http://blast.ncbi.nlm.nih.gov/Blast)). Gene models were also obtained by *ab-initio* gene  
179 prediction with FGENESH (Solovyev et al., 2006). Only FGENESH gene models with  
180 protein sequence support from NCBI or *Ensembl* Plant protein databases  
181 ([plants.ensembl.org](http://plants.ensembl.org)) were used. Gene models with greater than 90% protein or  
182 nucleotide sequence identity and more than 75% sequence coverage to already  
183 annotated genes on NCBI or *Ensembl* databases were considered as high confidence  
184 genes. Gene models that did not meet these criteria were considered as low confidence  
185 genes, and were not analysed further.

186

### 187 ***TaMKK3-A* genotyping**

188 A Kompetitive Allelic Specific PCR (KASP; Smith and Maughan, 2015) assay was  
189 developed for genotyping the C to A (C>A) causal *TaMKK3-A* mutation reported by

190 Torada et al. (2016). For this, two allele-specific reverse primers (*TaMKK3-A-snp1-*  
191 *res*: TTTTGGCTTCGCCCTTAAGG and *TaMKK3-A-snpA1-sus*:  
192 TTTTGGCTTCGCCCTTAAGT) each containing the allele-specific SNP at the 3'  
193 end, were used in combination with a common A-genome specific forward primer  
194 (GCATAGAGATCTAAAGCCAGCA). To distinguish the amplification signal  
195 produced from each allele specific primer, FAM and HEX fluorescence dye probes  
196 (Ramirez-Gonzalez et al., 2015) were added to the 5' end of *TaMKK3-A-snpA1-res*  
197 and *TaMKK3-A-snpA1-sus*, respectively. KASP assays were performed as previously  
198 described (Shorinola et al., 2016).

199

200 In addition to the KASP assay, a genome-specific Cleavage Amplified Polymorphism  
201 Sequence (CAPS) assay (Konieczny and Ausubel, 1993), designated as *TaMKK3-A-*  
202 *caps*, was developed. This CAPS marker is associated with the presence/absence of  
203 an *Hpy166II* restriction site which co-localises with the C>A causal polymorphism in  
204 the fourth exon of *TaMKK3-A*. Genome-specific primer pairs (Forward:  
205 CACCAAAGAATAGAAATGCTCTCT and Reverse:  
206 AGGAGTAGTTCTCATTGCGG) were designed to amplify an 887-bp sequence  
207 including the fourth exon. PCR was performed with Phusion High Fidelity polymerase  
208 (NEB, UK; Cat No: M0530S) in a 50 µL volume containing 20 % buffer, 0.2 mM of  
209 dNTP, 5 µM each of *TaMKK3-A-cap* forward and reverse primers, 3 % of DMSO,  
210 200 - 400 ng of genomic DNA and 0.5 unit of Phusion polymerase (NEB, UK; Cat  
211 No: M0530S). Thermal cycling was done with Eppendorf Mastercycler® Pro Thermal  
212 Cyclers with the following programme: initial denaturation at 98 °C for 2 mins; 35  
213 cycles of denaturation at 98 °C for 30 s; Annealing at 62 °C for 30 s and extension at  
214 72 °C for 60 s; final extension at 72 °C for 10 mins. Following PCR amplification, a  
215 25 µL restriction digest reaction containing 21.5 µL of the final PCR reaction, 2.5 µL  
216 of CutSmart® Buffer (NEB, UK; Cat No: B7204S) and 10 units of *Hpy166II* was  
217 incubated at 37 °C for 1 hr. Digest products were separated on a 1.5 % agarose gel.

218

### 219 ***PM19-A1* genotyping**

220 Detection of an 18 bp deletion on the promoter region of *PM19-A1* was carried out  
221 using primers TaPM19-A1-5F (GAAACAGCTACCGTGTAAGC) and TaPM19-  
222 A1-5R (TGGTGAAGTGGAGTGTAGTGG) reported by Barrero et al. (2015). PCR  
223 reaction mixture contained template DNA, 2.5 mM MgCl<sub>2</sub>, 1.5 mM dNTP, 1.5 µM of  
224 each primer, and 1 unit of *Taq* polymerase (NEB). The reaction mixture was made up  
225 to a total volume of 10 µl. The PCR conditions were as follows: 3 min at 94°C,  
226 followed by 30 cycles of 40 s at 94°C, 40 s at 60°C, and 1 min at 72°C. The last step  
227 was incubation for 7 min at 72°C. The PCR products were resolved on a 4% agarose  
228 gel and visualized with SYBR green I (Cambrex Bio Science, Rockland, ME.).

229

### 230 **Germplasm for Association Mapping**

231 We genotyped *PM19* and *TaMKK3-A* across 23 wheat varieties previously reported to  
232 segregate for *Phs-A1*, including UK (Alchemy, Robigus, Option, Claire, Boxer,  
233 Soleil), Australian (Yitpi, Baxter, Chara, Westonia, Cranbrook, Aus1408, Janz,  
234 Cunningham, Halberd), Japanese (Kitamoe, Haruyokoi, OS21-5), Mexican/CIMMYT  
235 (W7984, Opata M85), Canadian (Leader), Chinese (SW95-50213) and Swiss varieties  
236 (Münstertaler). We also genotyped *TaMKK3-A* in accessions from progenitor species  
237 *T. urartu* (41 accessions; A<sup>u</sup> genome), *T. turgidum* ssp. *dicoccoides* (151 accessions;  
238 AABB genomes), 804 hexaploid accessions from the Watkins landrace collection

239 (Wingen et al., 2014), and 457 modern European bread wheat varieties from the  
240 Gediflux collection released between 1945 and 2000 (Reeves et al., 2004).

241

### 242 **Variant Calling and Haplotype Analysis**

243 We examined the haplotype structure around the *Phs-A1* locus in three different  
244 germplasm sets. These included 457 varieties in the Gediflux collection, a panel of  
245 200 Australian varieties, and the wheat Haplotype Map (HapMap) panel consisting of  
246 62 diverse global accessions (Jordan et al., 2015). For the HapMap panel, we selected  
247 polymorphic sites as follows. We extracted SNP information from published variant  
248 call files (VCF) produced from whole exome capture (WEC) resequencing dataset of  
249 the 62 HapMap lines (accessible at [www.wheat-urgi.versailles.inra.fr/Seq-Repository/Variations](http://www.wheat-urgi.versailles.inra.fr/Seq-Repository/Variations)). For this, the corresponding IWGSC contig information for  
250 genes represented in the *Phs-A1* physical map were first obtained and used to filter the  
251 HapMap VCF for SNP sites located within these contigs. We kept SNP sites with  
252 allele frequencies of >5 % and accessions with >80% homozygous calls across SNPs.  
253 Allele information at the selected SNP loci was reconstructed for each line using the  
254 reference, alternate and genotype field information obtained from the VCF. Haplotype  
255 cluster analysis was done with Network 5.0.0.0 (Fluxus Technology Limited, UK)  
256 using the Median Joining Network Algorithm.  
257

258

### 259 **Pedigree Visualisation**

260 Pedigree information was obtained from the Genetic Resources Information System  
261 for Wheat and Triticale (GRIS, <http://wheatpedigree.net/>) and the International Crop  
262 Information System (ICIS: [www.icis.cgiar.org](http://www.icis.cgiar.org)). Pedigree visualisation was performed  
263 with Helium (Shaw et al., 2014). The coefficient of parentage (COP) analysis (i.e. the  
264 probability that alleles of two individuals are identical by descent) was calculated for  
265 all pairwise comparisons of lines within the most prevalent haplotypes (Australian:  
266 H1/H2 and H5/H7; UK: H3 and H12). For accuracy, landraces or cultivars with  
267 unknown or ambiguous pedigrees were not included in the COP analysis. Diversity  
268 within haplotype groups was estimated by the mean calculation of all COPs within  
269 each matrix.

270

## 271 **Results**

272

### 273 ***TaMKK3-A* and *PM19* are located within a 1.2 Mb physical interval.**

274 We constructed an extended physical map across the *Phs-A1* interval to investigate the  
275 physical proximity between the *TaMKK3-A* and *PM19* candidate genes. Using *PM19-  
276 A1* and *TaMKK3-A* sequences as queries, we screened *in silico* a BAC library of flow-  
277 sorted 4AL chromosome arm of the bread wheat cultivar Chinese Spring (CS). *PM19-  
278 A1* and *TaMKK3-A* were found on two independent non-overlapping BAC clone  
279 clusters which were anchored on the high resolution radiation hybrid map of  
280 chromosome 4A (Balcárková et al., 2016). The MTP of Cluster 16421 (*PM19*) was  
281 comprised of eleven BAC clones whereas the MTP of Cluster 285 (*TaMKK3-A*)  
282 included four BAC clones (Figure 1A; Table S1).

283

284 Individual BACs were sequenced, assembled, repeat-masked and annotated for coding  
285 sequences. Cluster 16421 included nine high-confidence genes in addition to the  
286 *PM19-A1* and *PM19-A2* genes. These included *YUCCA3-like*, *Myosin-J Heavy Chain  
287 protein*, *Ubiquitin Conjugating Enzyme*, *Amino-Cyclopropane Carboxylate Oxidase 1  
288 like (ACC Oxidase-1)*, two *Leucine-Rich Repeat Kinases (LRR kinase 1 and LRR*

289 *kinase 2*), *Agmatine Coumaroyl Transferase*, *Malonyl Coenzyme A:anthocyanin 3-O-*  
290 *glucoside-6"-O-malonyltransferase* and a gene encoding for a hypothetical protein. In  
291 addition to *TaMKK3-A*, Cluster 285 contained four additional genes including *Protein*  
292 *Phosphatase1-Like (PPI-Like)*, *Activating Signal Co-integrator 1- Like (ASCI-Like)*,  
293 *Ethylene Responsive Factor-1B-Like (ERF-1B-Like)* and a gene fragment showing  
294 high sequence similarity to *ERF-1B-Like* and as such designated as *ERF-C*. Together,  
295 this highlights the presence of at least 16 protein-coding genes across the *Phs-A1*  
296 interval in hexaploid bread wheat (Figure 1).

297

298 We also characterised the *Phs-A1* interval in the recently constructed assembly of a  
299 wild emmer wheat, *Zavitan* (Figure 1B; Hen-Avivi et al., 2016). This allowed  
300 comparative analysis of the *Phs-A1* interval in tetraploid and hexaploid wheat species.  
301 Fifteen of the 16 genes found in the CSS physical map were located on two *Zavitan*  
302 scaffolds. Nine of these 15 genes were positioned across a 0.93 Mb interval on the  
303 *Zavitan* 4A pseudomolecule. These included 4 genes from BAC Cluster 285 and five  
304 genes from BAC Cluster 16421 (Figure 1). The remaining six genes spanned a 0.13  
305 Mb interval on an unanchored scaffold. On average, the coding sequence identity  
306 between CS and *Zavitan* was 99.7% across the genes shared by both assemblies. We  
307 could not find sequence for *ERF-C* in the *Zavitan* assembly at similar identity. We  
308 annotated two genes encoding for disease resistance protein *RPM1* in the *Zavitan*  
309 sequence corresponding to the gap between the two CS BAC clusters. Combining the  
310 CS and *Zavitan* physical maps, the physical region between *TaMKK3-A* and the *PM19*  
311 genes was covered and estimated to be approximately 1.2 Mb (Figure 1).

312

### 313 ***TaMKK3-A* is most closely associated with *Phs-A1*.**

314 Torada et al. (2016) reported a C>A mutation in position 660 of the *TaMKK3-A* coding  
315 sequence (C660A) as being causative of the *Phs-A1* effect. Using alignments of the  
316 three wheat genomes, we developed a genome-specific and co-dominant KASP assay  
317 for this SNP designated as *TaMKK3-A-snp1*. The *TaMKK3-A-snp1* assay is co-  
318 dominant as it distinguished between heterozygotes and homozygotes F<sub>2</sub> progenies in  
319 the *Alchemy* x *Robigus* population previously reported to segregate for *Phs-A1*  
320 (Shorinola et al., 2016; Figure 2A). We also developed a CAPS marker (Konieczny  
321 and Ausubel, 1993) for *TaMKK3-A* to enable genotyping of *Phs-A1* using a gel-based  
322 assay. This marker, designated as *TaMKK3-A-cap*, amplifies a genome-specific 887  
323 bp region and is designed to discriminate for the presence of an *Hpy166II* site  
324 (GTNNAC) which is lost by the C660A mutation. Dormant lines with the C allele  
325 maintain the *Hpy166II* site which leads to digestion of the 887 bp amplicon into  
326 fragments of 605 and 282 bp (Figure 2B). Conversely, non-dormant lines with the A  
327 allele lose the *Hpy166II* site and hence remain intact (887 bp) after digestion. As with  
328 the KASP assay, the CAPS marker was co-dominant when used to genotype F<sub>2</sub>  
329 progenies (Figure 2B).

330

331 Using the KASP assay, we genotyped an association panel comprised of the parents  
332 of 11 bi-parental mapping populations and a MAGIC population in which *Phs-A1* had  
333 previously been reported (Table 1). The *TaMKK3-A-snp1* was polymorphic and  
334 diagnostic for *Phs-A1* in all parental lines. Consistent with Torada et al. (2016), non-  
335 dormant sprouting-susceptible parents carry the *TaMKK3-A* "A" allele while all the  
336 dormant sprouting-resistant parents carry the *TaMKK3-A-snp1* "C" allele (Table 1).  
337 We genotyped the same panel for the promoter deletion in *PM19-A1* previously  
338 proposed to be causal of PHS susceptibility (Barrero et al., 2015). We found the *PM19-*

339 *AI* deletion to be linked with the non-dormant *TaMKK3-A* A allele in most, but not  
340 all, of these populations. The putative linkage was broken in the dormant Kitamoe,  
341 OS21-5 and SW95-50213 parents, whose dormancy phenotypes are not consistent  
342 with their *PM19-A1* promoter deletion status, but can be explained by their *TaMKK3-*  
343 *A* genotype (Table 1). This association was confirmed genetically in the SW95-50213  
344 x AUS1408 cross. This population, which did not segregate for the dormancy  
345 phenotype in the original work by Mares et al. (2005), is monomorphic for the dormant  
346 C allele at *TaMKK3-A*, but segregates for the *PM19-A1* deletion. Similarly, parents of  
347 the two populations OS21-5 x Haruyokoi and Kitamoe x Münstertaler segregating for  
348 the dormancy phenotype in the work by Torada et al. (2005) are monophormic for the  
349 *PM19-A1* deletions, but segregate accordingly for the *TaMKK3-A* causal mutation.  
350 These results strongly support *TaMKK3-A* as the most likely causal gene for *Phs-A1*  
351 across this highly-informative panel.

352

### 353 **Origin and distribution of the *TaMKK3-A* alleles in ancestral and modern** 354 **germplasm**

355 To examine the origin, distribution and allele frequencies of the causative *TaMKK3-*  
356 *A* C660A SNP, we genotyped a set of 41 *T. urartu* (diploid: AA genome) and 151 *T.*  
357 *turgidum* ssp. *dicoccoides* (tetraploid: AABB genome) accessions. These represent the  
358 diploid and tetraploid progenitors of the modern bread wheat A genome on which *Phs-*  
359 *A1* is located. Torada et al. (2016) previously suggested that the non-dormant A allele  
360 was the mutant form since the dormant C SNP was conserved across different species.  
361 Across *T. urartu* accessions, the C allele was predominant (39 accessions) while the  
362 non-dormant A allele was present in only two accessions (5% allele frequency; Figure  
363 2C). Similarly, across *T. dicoccoides* accessions, the dormant C allele frequency was  
364 found in 134 accessions while the non-dormant allele was found in 17 accessions (11%  
365 allele frequency; Figure 2C). Our results are consistent with Torada et al. (2016) in  
366 that the non-dormant A allele is derived from the wild type C allele. In addition, the  
367 presence of the A allele across both progenitor species suggests that the mutation  
368 predates the hybridization and domestication events that gave rise to modern bread  
369 wheat.

370

371 We also genotyped the Watkins Collection representing a set of global bread wheat  
372 landraces collected in the 1920 and 1930s (Wingen et al., 2014), as well as the  
373 Gediflux collection comprised of modern European bread wheat varieties released  
374 between 1945 and 2000 (Reeves et al., 2004). The allele frequency of the non-dormant  
375 A allele was 13% in the Watkins landrace collection (Figure 2C; Table S2),  
376 comparable to that in *T. dicoccoides* (11%). However, the non-dormant A allele  
377 frequency in the Gediflux collection was 48% across 457 varieties (Figure 2C). This  
378 represents a marked increase of the non-dormant allele in the more modern European  
379 collection when compared to European accessions within the Watkins landraces in  
380 which the non-dormant A allele was found at a 15% frequency (Table S2).

381

382 To determine if the *TaMKK3* dormant allele was associated with improved end-use  
383 quality, we genotyped 41 UK varieties representing the four UK market classes  
384 (Figure 2D, nabim groups 1-4; nabim, 2014). Of the 13 bread-making quality varieties  
385 (groups 1 and 2), eleven (85%) had the dormant *TaMKK3* allele. This frequency was  
386 significantly higher (Contingency table  $\chi^2 = 8.497$ ;  $P < 0.01$ ) than in the 28 biscuit and  
387 animal feed varieties (groups 3 and 4) in which the *TaMKK3* dormant allele was only  
388 present in 10 varieties (36%).



389

### 390 ***Phs-A1* haplotypes in global germplasm**

391 We next examined the allelic diversity across the extended *Phs-A1* interval (including  
392 *TaMKK3-A* and *PM19*) with the aim of elucidating the haplotype structure across this  
393 region. For this, we used the SNP Haplotype Map (HapMap) dataset obtained from  
394 whole exome capture resequencing of 62 diverse germplasm (Jordan et al., 2015).  
395 From this SNP dataset, we obtained data for eight of the sixteen genes found in the  
396 *Phs-A1* interval (*PPI-like*, *TaMKK3-A*, *ASC1-like*, *ERF-C*, *LRR Kinase 1*, *LRR Kinase*  
397 *2*, *PM19-A2* and *PM19-A1*) corresponding to 51 SNPs. To improve the accuracy of  
398 the haplotype analysis, we selected accessions with >80% homozygous calls across  
399 the selected genes and SNPs with >5% allele frequency. This filtering resulted in 39  
400 SNPs across the eight genes in 58 accessions.

401

402 Across the *Phs-A1* interval (*PPI-like* to *PM19-A1*) we identified 14 distinct  
403 haplotypes (H1–14; Figure 3A). Haplotypes were comprised of a mix of cultivars,  
404 landrace, breeding lines and synthetic population in varying proportion (Figure 3B;  
405 Table S3). H1 represented the major haplotype present in 33% of all accessions  
406 examined, whereas five haplotypes were relatively infrequent (<5%; H2, H5, H6, H9,  
407 H13). Also, we observed haplotype linkage from the *TaMKK3-A* to *LRR Kinase 2* in  
408 76% of the accessions, highlighting possible evidence for limited recombination in  
409 this 780 kb interval in global germplasm. Similar haplotype linkage was observed at  
410 the tandem *PM19* loci in all but one of the 58 lines.

411

412 Five of the selected SNPs were found in *TaMKK3-A* including the causal C660A SNP  
413 in the fourth exon and four additional intron SNPs. These five SNPs defined four  
414 distinct *TaMKK3-A* haplotypes (Figure 3C, *TaMKK3-A\_HapA* - D) in the HapMap  
415 collection with only one having the non-dormant A allele (*TaMKK3-A\_HapA*). The  
416 non-dormant A allele was present in 50% of the HapMap population, consistent with  
417 the Gediflux collection (48%).

418

### 419 **Haplotype structure at the *Phs-A1* interval in UK and Australian germplasm**

420 To characterise a larger set of European (Gediflux) and Australian germplasm, we  
421 selected seven informative polymorphisms across seven genes from the HapMap  
422 dataset and developed KASP assays for these (Table S4). Using these seven assays,  
423 we defined 16 haplotypes in the European Gediflux collection (Table S5). This  
424 included eleven haplotypes previously identified in the global HapMap dataset and  
425 five haplotypes unique to this European germplasm set, although these were relatively  
426 infrequent (Figure 4). The UK subpopulation within the Gediflux collection comprised  
427 of 176 varieties and contained 11 of the 15 haplotypes identified. Six haplotypes  
428 include the dormant *TaMKK3-A* C allele (63% of UK varieties), with the majority of  
429 these varieties sharing haplotype H12 (89 of 110 varieties), consistent with the wider  
430 Gediflux population (Figure 4). This suggests one main source of PHS resistance in  
431 UK and European germplasm.

432

433 By combining haplotype and pedigree information for these lines we could trace, to a  
434 reasonable degree of accuracy, the founder lines for the most common resistant  
435 haplotypes in UK germplasm (Figure S1). We identified the origin of the major  
436 resistant haplotype in the UK germplasm (H12) as Vilmorin-27, a French winter wheat  
437 variety released in the late 1920s (Figure 5, Figure S2). Vilmorin-27 was a direct  
438 parent and the donor of haplotype H12 for Cappelle-Desprez, a major founder variety

439 for wheat breeding programmes in Northern France and the UK released in 1948.  
440 Haplotype H12 has since remained an important part of UK breeding programmes  
441 through varieties such as Rendezvous and Riband (released between 1985-1987).

442

443 Within the 200 Australian varieties we identified twelve haplotypes including ten  
444 previously identified HapMap haplotypes, and two Australian-specific haplotypes at  
445 low frequency (<1%, Table S6, Figure S3). Eight haplotypes present in 89 varieties  
446 (44.5%) have the dormant *TaMKK3-A* C allele while the other four haplotypes present  
447 in 111 varieties (55.5%) have the non-dormant *TaMKK3-A* A allele (Figure S4). This  
448 represents a near balanced distribution of both alleles in Australian germplasm. In this  
449 set, 71% of lines with the dormant *TaMKK3-A* C alleles were traced to Federation (or  
450 Purple Straw) ancestry. Across the entire set, the alternative, non-dormant allele was  
451 more associated with the presence of cv. Gabo or CIMMYT-derived material in the  
452 pedigree. These lines had a more recent average release date of 1976 compared to the  
453 lines with the dormant allele (average release date 1941).

454

455 The mean coefficient of parentage (COP) for the Australian and UK Gediflux set of  
456 lines was 0.10 and 0.11 respectively (Table 2). Within each germplasm set, the lines  
457 with the most prevalent haplotypes had higher COP values, indicating a higher degree  
458 of relatedness amongst these lines relative to the entire collection (Table 2).

459

## 460 Discussion

461

### 462 *Physical Map*

463 We characterised the *Phs-A1* interval by constructing a 1.5 Mb physical map spanning  
464 the *PM19* and *TaMKK3-A* candidate genes (Barrero et al., 2015; Torada et al., 2016)  
465 and including 16 protein-coding genes. We observed near perfect sequence and gene  
466 content conservation in the interval between hexaploid and tetraploid physical maps.  
467 A similar overall collinearity between bread wheat, barley and *Brachypodium* was also  
468 observed except for the interval between *ACC Oxidase-1* and *ERF-C* where the gene  
469 content in each species diverged (Figure S5). The *PM19* candidates were conserved  
470 across these species, whereas *TaMKK3-A* was only present in barley and wheat.

471

472 Sequence information from the BAC-based CS assembly and the whole genome  
473 shotgun Zavitan assemblies was used in a complementary manner. Neither assembly  
474 was fully contiguous across the *Phs-A1* interval, but the gaps were different in the two  
475 assemblies allowing the spanning of the complete interval. This lack of contiguity was  
476 also present in the IWGSC CS v0.4 (available at  
477 [https://urgi.versailles.inra.fr/blast\\_iwgsc/blast.php](https://urgi.versailles.inra.fr/blast_iwgsc/blast.php)), TGAC (Clavijo et al., 2017) and  
478 Refeqv1.0 assemblies, where intervals covering *TaMKK3-A* and *ASCI-Like* were  
479 unanchored. While the new whole genome assemblies offer major improvements in  
480 contiguity, the available BAC physical maps will be of value to assign unanchored  
481 scaffolds or solve inconsistencies in regions where contiguity is broken.

482

### 483 *TaMKK3-A* determines *Phs-A1* effect across diverse germplasm

484 The 1.5 Mb physical interval which defines *Phs-A1* includes the proposed candidates  
485 *PM19* and *TaMKK3-A*, as well as other genes with potential roles in  
486 dormancy/germination regulation. For example, *ACC Oxidase-1* catalyses the last  
487 steps in the biosynthesis of ethylene – a germination promoting hormone (Matilla and  
488 Matilla-Vázquez, 2008; Linkies and Leubner-Metzger, 2012; Corbineau et al., 2014).

489 However, using two bi-parental mapping populations we showed linkage of *Phs-A1*  
490 to the interval between *PPI-Like* – *LRR Kinase 2* in UK populations, thereby  
491 excluding the *PM19* and *ACC Oxidase-1* loci as candidate genes (Shorinola et al.,  
492 2016). This was consistent with Torada et al. (2016) who identified *TaMKK3-A* as the  
493 causal gene in their mapping population and work in barley which identified the barley  
494 homologue (*MKK3*) as the causal gene for the seed dormancy QTL SD2 (Nakamura  
495 et al., 2016).

496

497 In support of this, the causal *TaMKK3-A* C660A SNP is perfectly associated with the  
498 phenotypes of 19 diverse parents of eleven mapping population in which *Phs-A1* had  
499 previously been identified. This was also the case for the parents of the MAGIC  
500 population (Yipti, Chara, Westonia, Baxter) previously used to propose the *PM19* loci  
501 as the causal gene (Barrero et al., 2015). Barrero et al (2015) proposed a promoter  
502 deletion in *PM19-A1* affecting motifs important for ABA responsiveness as the cause  
503 of non-dormancy in sprouting susceptible genotypes. The *PM19-A1* deletion and the  
504 non-dormant *TaMKK3-A* A allele are in complete linkage in all the non-dormant  
505 parents from the multiple mapping populations. However, the *PM19-A1* promoter  
506 deletion did not account for the dormant phenotype of Kitamoe, OS21-5 and SW95-  
507 50213 (Table 1). These dormant varieties have the *PM19-A1* promoter deletion  
508 associated with low dormancy, but carries the dormant *TaMKK3-A* allele. These  
509 natural recombinants suggest that *TaMKK3-A* is the causal *Phs-A1* gene. SW95-50213  
510 is a Chinese landrace which is an important source of *Phs-A1*-mediated dormancy in  
511 Australian breeding programs. When SW95-50213 was crossed to a line carrying both  
512 *TaMKK3-A* and *PM19* dormant alleles (AUS1408), no grain dormancy QTL could be  
513 identified (Mares et al., 2005). Despite the segregation of the *PM19-A1* promoter  
514 polymorphism in this population, all lines displayed dormant to intermediate  
515 dormancy phenotype consistent with the *TaMKK3-A* genotype of their parents. Taken  
516 together, this evidence confirms the tight linkage between *TaMKK3-A*, *PM19*, and the  
517 *Phs-A1* phenotype, and suggest that *TaMKK3-A*, but not *PM19*, is the causal gene  
518 underlying sprouting variation associated with *Phs-A1* in diverse European, North  
519 American, Australian and Asian germplasm.

520

### 521 **Breeding implications**

522 Given the identification of a number of *T. urartu* accessions with the non-dormant A  
523 allele, it is likely that the C660A mutation originates from this diploid ancestor and  
524 predates the domestication and hybridisation events that gave rise to modern bread  
525 wheat. The non-dormant allele frequency was below 15% in accessions and landraces  
526 collected previous to 1920, but rose sharply to close to 50% in more modern  
527 germplasm. It is tempting to speculate that this could be due to selective pressure by  
528 breeders over the past 70 years for the non-dormant A allele in European and  
529 Australian environments. This pressure could be driven by selection for genotypes  
530 with more rapid and uniform germination that would be associated with the non-  
531 dormant allele. However, allele frequencies for both alleles have remained overall  
532 balanced given the improved end-use quality associated with the dormant allele. This  
533 hypothesis is supported by the fact that 85% of UK bread-making varieties carry the  
534 dormant allele, compared to only 35% of feed and biscuit-making varieties.

535

536 To facilitate breeding for PHS resistance, we developed co-dominant KASP and  
537 CAPS markers for the causal *TaMKK3-A* mutation, as well as KASP markers for the  
538 wider region. We identified fourteen *Phs-A1* haplotypes in a global germplasm panel

539 with four haplotypes for the *TaMKK3* gene itself, of which only one included the  
540 C660A non-dormant SNP. Comparison of Australian and UK haplotypes highlighted  
541 distinct frequencies in both sets with the most prevalent haplotypes containing the  
542 dormant *TaMKK3-A* allele differing in both countries. Haplotype H5/H7 is most  
543 frequent in Australian varieties, whereas haplotype H12 dominates in the UK.  
544 Interestingly, these haplotypes are either rare (<5% H5/H7 in UK) or absent (H12 not  
545 present in Australia) in the other country, suggesting distinct sources of pre-harvest  
546 sprouting resistance in Australian and UK breeding programmes. Understanding  
547 haplotypes structure across genes of agronomic interest is increasingly possible with  
548 the latest advances in wheat genomics (Clavijo et al., 2017; Uauy, 2017). It is also  
549 increasingly relevant given potential negative linkage drag associated with major  
550 phenology traits (Voss-Fels et al., 2017). The markers and knowledge generated in  
551 this study should facilitate the choice of parental genotypes for the deployment of  
552 *TaMKK3* in commercial cultivars.

553

554 The earliest line in the Australian set (Golden Drop, released 1840) carries the  
555 favourable *TaMKK3-A* 'C' SNP and also the most prevalent haplotype (H5/H7) at  
556 this locus. Golden Drop was derived from a Purple Straw/Yandilla cross and its sister  
557 line, Federation (released in 1901) become the foundation of many successful  
558 Australian cultivars due to earlier maturity and thus ability to avoid drought stress late  
559 in the growing season. Not only was Federation wheat better adapted to the Australian  
560 climate, it also had improved grain quality for milling, and so become widely adopted  
561 by breeders (Eagles et al., 2009).

562

563 The next major introduction of germplasm into Australia occurred in the 1970's, as  
564 CIMMYT material was deployed widely by breeders seeking traits affecting height,  
565 quality and disease resistance (Brennan and Fox, 1998). Important CIMMYT parents  
566 in Australian breeding include Sonora-64, Pitic, Pavon-76, WW15 and WW80.  
567 Pedigree analysis suggests that such material could be the source of the most prevalent  
568 haplotype in Australia (H1/H2) containing the non-favourable *TaMKK3-A* allele. A  
569 high proportion of modern Australian cultivars with the non-dormant haplotype  
570 suggests opportunities may exist for the incorporation of favourable alleles at the  
571 locus.

572

### 573 **Future outlook**

574 The dormant *TaMKK3-A* C allele is predominant in all the progenitor and historic  
575 germplasm evaluated in this study, suggesting that it represents the ancestral allele as  
576 proposed by Torada et al. (2016). The N220K amino acid substitution (C660A  
577 mutation) in the kinase domain results in a gain-of-function allele which reduces  
578 dormancy in wheat. This is in contrast with barley where the non-dormant *MKK3*  
579 allele is ancestral and the N260T substitution in the kinase domain results in a loss-of-  
580 function allele leading to increased seed dormancy (Nakamura et al., 2016). This  
581 provides an additional example of how for the same biological process, gain-of-  
582 function (dominant) mutations have been more readily selected in polyploid wheat  
583 compared to recessive variation in diploid barley (Borrill et al., 2015). The fact that  
584 the same gene has been selected in both species also suggests that the kinase activity  
585 of *TaMKK3-A* can be modulated to fine-tune the level of seed dormancy in temperate  
586 cereals. A better understanding of the activity and regulation of *TaMKK3-A* and its  
587 homoeologs could allow the identification of mutants (Krasileva et al., 2017) or the

588 creating of gene edited alleles (Zong et al., 2017) with different levels of activity or  
589 the design of novel alleles with different degrees of dormancy.

590

### 591 **Conflict of interest statement**

592 The authors declare no conflict of interest.

593

### 594 **Author contributions**

595 OS led the genotype and pedigree analysis of the UK varieties, annotation of BAC  
596 sequences, developed the KASP and CAPS marker, and analysed the HapMap data;  
597 JH performed pedigree analysis of Australian; JFGT and MJH performed genotyping  
598 of Australian varieties; MV, BB and KH constructed the 4AL physical map of CS;  
599 AD constructed the physical map of tetraploid wheat Zavitan; AT performed  
600 genotyping of Japanese varieties; JMB led the work on Australian varieties; OS,  
601 CU, JH, JMB contributed to the writing of the manuscript; OS and CU designed the  
602 experiments.

603

### 604 **Funding**

605 This work was supported by the UK Biotechnology and Biological Sciences  
606 Research Council (BBSRC), AHDB-HGCA, KWS, Lantmännen, Limagrain and  
607 RAGT (BB/I01800X/1, BB/J004588/1, BB/J004596/1, BB/P013511/1,  
608 BB/P016855/1). BB and MV were supported by grant LO1204 from the National  
609 Program of Sustainability I, by the Czech Science Foundation (14-07164S). OS was  
610 supported by the John Innes Foundation.

611

### 612 **Acknowledgements**

613 We thank Chloe Riviere for help with plant husbandry and Dr Sergio Galvez-Rojas  
614 for advice on data visualisation. We also thank Katerina Viduka for the assistance in  
615 the genotyping, Dr Ben Trevaskis and Dr Howard Eagles for assistance in the pedigree  
616 analysis of the Australian collection, and Dr. Frank Gubler for the helpful discussions  
617 and support. We thank the International Wheat Genome Sequencing Consortium  
618 (IWGSC) for pre-publication access to the wheat genome RefSeq v0.4 and v1.0.

### 619 **References**

- 620 Albrecht, T., Oberforster, M., Kempf, H., Ramgraber, L., Schacht, J., Kazman, E., Zechner,  
621 E., Neumayer, A., Hartl, L., and Mohler, V. (2015). Genome-wide association  
622 mapping of preharvest sprouting resistance in a diversity panel of European winter  
623 wheats. *Journal of applied genetics* 56, 277-285.
- 624 Balcárková, B., Frenkel, Z., Škopová, M., Abrouk, M., Kumar, A., Chao, S., Kianian, S.F.,  
625 Akhunov, E., Korol, A.B., Doležel, J., and Valárik, M. (2016). A High Resolution  
626 Radiation Hybrid Map of Wheat Chromosome 4A. *Frontiers in plant science* 7, 2063.
- 627 Barnard, A., and Smith, M.F. (2009). The effect of rainfall and temperature on the preharvest  
628 sprouting tolerance of winter wheat in the dryland production areas of the Free State  
629 Province. *Field Crops Research* 112, 158-164.
- 630 Barrero, J.M., Cavanagh, C., Verbyla, K.L., Tibbits, J.F., Verbyla, A.P., Huang, B.E.,  
631 Rosewarne, G.M., Stephen, S., Wang, P., Whan, A., Rigault, P., Hayden, M.J., and  
632 Gubler, F. (2015). Transcriptomic analysis of wheat near-isogenic lines identifies  
633 PM19-A1 and A2 as candidates for a major dormancy QTL. *Genome biology* 16, 93.
- 634 Barrero, J.M., Jacobsen, J., and Gubler, F. (2010). "Seed Dormancy: Approaches for Finding  
635 New Genes in Cereals," in *Plant Developmental Biology - Biotechnological*

- 636 *Perspectives: Volume 1*, eds. E.C. Pua & M.R. Davey. (Berlin, Heidelberg: Springer  
637 Berlin Heidelberg), 361-381.
- 638 Borrill, P., Adamski, N., and Uauy, C. (2015). Genomics as the key to unlocking the polyploid  
639 potential of wheat. *The New phytologist* 208, 1008-1022.
- 640 Brennan, J.P., and Fox, P.N. (1998). Impact of CIMMYT varieties on the genetic diversity of  
641 wheat in Australia, 1973-1993. *Australian Journal of Agricultural Research* 49, 175-  
642 178.
- 643 Cabral, A.L., Jordan, M.C., McCartney, C.A., You, F.M., Humphreys, D.G., Maclachlan, R.,  
644 and Pozniak, C.J. (2014). Identification of candidate genes, regions and markers for  
645 pre-harvest sprouting resistance in wheat (*Triticum aestivum* L.). *BMC plant biology*  
646 14, 340.
- 647 Chen, C.X., Cai, S.B., and Bai, G.H. (2008). A major QTL controlling seed dormancy and  
648 pre-harvest sprouting resistance on chromosome 4A in a Chinese wheat landrace.  
649 *Molecular Breeding* 21, 351-358.
- 650 Clavijo, B.J., Venturini, L., Schudoma, C., Accinelli, G.G., Kaithakottil, G., Wright, J.,  
651 Borrill, P., Kettleborough, G., Heavens, D., Chapman, H., Lipscombe, J., Barker, T.,  
652 Lu, F.H., Mckenzie, N., Raats, D., Ramirez-Gonzalez, R.H., Coince, A., Peel, N.,  
653 Percival-Alwyn, L., Duncan, O., Trosch, J., Yu, G., Bolser, D.M., Namaati, G.,  
654 Kerhornou, A., Spannagl, M., Gundlach, H., Haberer, G., Davey, R.P., Fosker, C.,  
655 Palma, F.D., Phillips, A., Millar, A.H., Kersey, P.J., Uauy, C., Krasileva, K.V.,  
656 Swarbreck, D., Bevan, M.W., and Clark, M.D. (2017). An improved assembly and  
657 annotation of the allohexaploid wheat genome identifies complete families of  
658 agronomic genes and provides genomic evidence for chromosomal translocations.  
659 *Genome research* doi:  
660 10.1101/gr.217117.116.
- 661 Corbineau, F., Xia, Q., Bailly, C., and El-Maarouf-Bouteau, H. (2014). Ethylene, a key factor  
662 in the regulation of seed dormancy. *Frontiers in plant science* 5, 539.
- 663 Cvikova, K., Cattonaro, F., Alaux, M., Stein, N., Mayer, K.F., Dolezel, J., and Bartos, J.  
664 (2015). High-throughput physical map anchoring via BAC-pool sequencing. *BMC*  
665 *plant biology* 15, 99.
- 666 Eagles, H.A., Cane, K., and Vallance, N. (2009). The flow of alleles of important photoperiod  
667 and vernalisation genes through Australian wheat. *Crop and Pasture Science* 60, 646-  
668 657.
- 669 Fang, J., and Chu, C. (2008). Abscisic acid and the pre-harvest sprouting in cereals. *Plant*  
670 *Signaling & Behavior* 3, 1046-1048.
- 671 Flintham, J. (2000). Different genetic components control coat-imposed and embryo-  
672 imposed dormancy in wheat. *Seed Science Research* 10, 43-50.
- 673 Flintham, J., Adlam, R., Bassoi, M., Holdsworth, M., and Gale, M.D. (2002). Mapping genes  
674 for resistance to sprouting damage in wheat. *Euphytica* 126, 39-45.
- 675 Frenkel, Z., Paux, E., Mester, D., Feuillet, C., and Korol, A. (2010). LTC: a novel algorithm  
676 to improve the efficiency of contig assembly for physical mapping in complex  
677 genomes. *BMC Bioinformatics* 11, 584-584.
- 678 Gao, X., Hu, C.H., H.Z., L., Yao, Y.J., Meng, M., Dong, L., Zhao, W.C., Chen, Q.J., and Li,  
679 X.Y. (2013). Factors affecting pre-harvest sprouting resistance in wheat (*triticum*  
680 *aestivum* l.): A review. *The Journal of Animal and Plant Sciences* 23, 556-565.
- 681 Gatford, K.T., Eastwood, R.F., and Halloran, G.M. (2002). Germination inhibitors in bracts  
682 surrounding the grain of *Triticum tauschii*. *Functional Plant Biology* 29, 881-890.
- 683 Hen-Avivi, S., Savin, O., Racovita, R.C., Lee, W.S., Adamski, N.M., Malitsky, S., Almekias-  
684 Siegl, E., Levy, M., Vautrin, S., Berges, H., Friedlander, G., Kartvelishvily, E., Ben-  
685 Zvi, G., Alkan, N., Uauy, C., Kanyuka, K., Jetter, R., Distelfeld, A., and Aharoni, A.  
686 (2016). A Metabolic Gene Cluster in the Wheat W1 and the Barley Cer-cqu Loci  
687 Determines beta-Diketone Biosynthesis and Glauconsness. *The Plant cell* 28, 1440-  
688 1460.
- 689 Jordan, K.W., Wang, S., Lun, Y., Gardiner, L.J., Maclachlan, R., Hucl, P., Wiebe, K., Wong,  
690 D., Forrest, K.L., Sharpe, A.G., Sidebottom, C.H., Hall, N., Toomajian, C., Close, T.,

- 691 Dubcovsky, J., Akhunova, A., Talbert, L., Bansal, U.K., Bariana, H.S., Hayden, M.J.,  
692 Pozniak, C., Jeddeloh, J.A., Hall, A., and Akhunov, E. (2015). A haplotype map of  
693 allohexaploid wheat reveals distinct patterns of selection on homoeologous genomes.  
694 *Genome biology* 16, 48.
- 695 Knox, R.E., Clarke, F.R., Clarke, J.M., Fox, S.L., Depauw, R.M., and Singh, A.K. (2012).  
696 Enhancing the identification of genetic loci and transgressive segregants for  
697 preharvest sprouting resistance in a durum wheat population. *Euphytica* 186, 193-206.
- 698 Konieczny, A., and Ausubel, F.M. (1993). A procedure for mapping Arabidopsis mutations  
699 using co-dominant ecotype-specific PCR-based markers. *The Plant journal : for cell  
700 and molecular biology* 4, 403-410.
- 701 Kottarachchi, N.S., Uchino, N., Kato, K., and Miura, H. (2006). Increased grain dormancy  
702 in white-grained wheat by introgression of preharvest sprouting tolerance QTLs.  
703 *Euphytica* 152, 421-428.
- 704 Krasileva, K., Buffalo, V., Bailey, P., Pearce, S., Ayling, S., Tabbita, F., Soria, M., Wang, S.,  
705 Consortium, I., Akhunov, E., Uauy, C., and Dubcovsky, J. (2013). Separating  
706 homeologs by phasing in the tetraploid wheat transcriptome. *Genome biology* 14,  
707 R66.
- 708 Krasileva, K.V., Vasquez-Gross, H.A., Howell, T., Bailey, P., Paraiso, F., Clissold, L.,  
709 Simmonds, J., Ramirez-Gonzalez, R.H., Wang, X., Borrill, P., Fosker, C., Ayling, S.,  
710 Phillips, A.L., Uauy, C., and Dubcovsky, J. (2017). Uncovering hidden variation in  
711 polyploid wheat. *Proceedings of the National Academy of Sciences* 114, E913-E921.
- 712 Kulwal, P., Ishikawa, G., Benschler, D., Feng, Z., Yu, L.-X., Jadhav, A., Mehetre, S., and  
713 Sorrells, M. (2012). Association mapping for pre-harvest sprouting resistance in white  
714 winter wheat. *Theoretical and Applied Genetics* 125, 793-805.
- 715 Kulwal, P.L., Kumar, N., Gaur, A., Khurana, P., Khurana, J.P., Tyagi, A.K., Balyan, H.S., and  
716 Gupta, P.K. (2005). Mapping of a major QTL for pre-harvest sprouting tolerance on  
717 chromosome 3A in bread wheat. *Theoretical and Applied Genetics* 111, 1052-1059.
- 718 Kumar, S., Knox, R., Clarke, F., Pozniak, C., Depauw, R., Cuthbert, R., and Fox, S. (2015).  
719 Maximizing the identification of QTL for pre-harvest sprouting resistance using seed  
720 dormancy measures in a white-grained hexaploid wheat population. *Euphytica* 205,  
721 287-309.
- 722 Lan, X.J., Wei, Y.M., Liu, D.C., Yan, Z.H., and Zheng, Y.L. (2005). Inheritance of seed  
723 dormancy in Tibetan semi-wild wheat accession Q1028. *Journal of applied genetics*  
724 46, 133-138.
- 725 Li, C., Ni, P., Francki, M., Hunter, A., Zhang, Y., Schibeci, D., Li, H., Tarr, A., Wang, J.,  
726 Cakir, M., Yu, J., Bellgard, M., Lance, R., and Appels, R. (2004). Genes controlling  
727 seed dormancy and pre-harvest sprouting in a rice-wheat-barley comparison.  
728 *Functional & integrative genomics* 4, 84-93.
- 729 Linkies, A., and Leubner-Metzger, G. (2012). Beyond gibberellins and abscisic acid: how  
730 ethylene and jasmonates control seed germination. *Plant Cell Reports* 31, 253-270.
- 731 Liu, S., Cai, S., Graybosch, R., Chen, C., and Bai, G. (2008). Quantitative trait loci for  
732 resistance to pre-harvest sprouting in US hard white winter wheat Rio Blanco.  
733 *Theoretical and Applied Genetics* 117, 691-699.
- 734 Lohwasser, U., Rehman Arif, M.A., and Börner, A. (2013). Discovery of loci determining pre-  
735 harvest sprouting and dormancy in wheat and barley applying segregation and  
736 association mapping. *Biologia Plantarum* 57, 663-674.
- 737 Mares, D., and Mrva, K. (2014). Wheat grain preharvest sprouting and late maturity alpha-  
738 amylase. *Planta* 240, 1167-1178.
- 739 Mares, D., Mrva, K., Cheong, J., Williams, K., Watson, B., Storlie, E., Sutherland, M., and  
740 Zou, Y. (2005). A QTL located on chromosome 4A associated with dormancy in  
741 white- and red-grained wheats of diverse origin. *Theoretical and Applied Genetics*  
742 111, 1357-1364.
- 743 Matilla, A.J., and Matilla-Vázquez, M.A. (2008). Involvement of ethylene in seed physiology.  
744 *Plant Science* 175, 87-97.

- 745 Mohan, A., Kulwal, P., Singh, R., Kumar, V., Mir, R., Kumar, J., Prasad, M., Balyan, H.S.,  
746 and Gupta, P.K. (2009). Genome-wide QTL analysis for pre-harvest sprouting  
747 tolerance in bread wheat. *Euphytica* 168, 319-329.
- 748 Mori, M., Uchino, N., Chono, M., Kato, K., and Miura, H. (2005). Mapping QTLs for grain  
749 dormancy on wheat chromosome 3A and the group 4 chromosomes, and their  
750 combined effect. *Theoretical and Applied Genetics* 110, 1315-1323.
- 751 Munkvold, J., Tanaka, J., Benscher, D., and Sorrells, M. (2009). Mapping quantitative trait  
752 loci for preharvest sprouting resistance in white wheat. *Theoretical and Applied  
753 Genetics* 119, 1223-1235.
- 754 Nabim (2014). *Wheat Varieties* [Online]. Available: [http://www.nabim.org.uk/wheat/wheat-](http://www.nabim.org.uk/wheat/wheat-varieties)  
755 [varieties](http://www.nabim.org.uk/wheat/wheat-varieties) [Accessed 19/04/2017 2017].
- 756 Nakamura, S., Pourkheirandish, M., Morishige, H., Kubo, Y., Nakamura, M., Ichimura, K.,  
757 Seo, S., Kanamori, H., Wu, J., Ando, T., Hensel, G., Sameri, M., Stein, N., Sato, K.,  
758 Matsumoto, T., Yano, M., and Komatsuda, T. (2016). Mitogen-Activated Protein  
759 Kinase Kinase 3 Regulates Seed Dormancy in Barley. *Current biology : CB* 26, 775-  
760 781.
- 761 Nave, M., Avni, R., Ben-Zvi, B., Hale, I., and Distelfeld, A. (2016). QTLs for uniform grain  
762 dimensions and germination selected during wheat domestication are co-located on  
763 chromosome 4B. *Theoretical and Applied Genetics* 129, 1303-1315.
- 764 Ogonnaya, F.C., Imtiaz, M., and Depauw, R.M. (2007). Haplotype diversity of preharvest  
765 sprouting QTLs in wheat. *Genome* 50, 107-118.
- 766 Ramirez-Gonzalez, R.H., Segovia, V., Bird, N., Fenwick, P., Holdgate, S., Berry, S., Jack, P.,  
767 Caccamo, M., and Uauy, C. (2015). RNA-Seq bulked segregant analysis enables the  
768 identification of high-resolution genetic markers for breeding in hexaploid wheat.  
769 *Plant Biotechnology Journal* 13, 613-624.
- 770 Reeves, J., Chiapparino, E., Donini, P., Ganai, M., Guiard, J., Hamrit, S., Heckenberger, M.,  
771 Huan, X., Van Kaauwen, M., Kochieva, E., Koebner, R., Law, J., Lea, V., Leclerc,  
772 V., Van Der Lee, T., Leigh, F., Van Der Linden, G., Malysheva, L., Melchinger, A.,  
773 Orford, S., Reif, J., Röder, M., Schulman, A., Vosman, B., Van Der Wiel, C., Wolf,  
774 M., and Zhang, D. (Year). "Changes over time in the genetic diversity of four major  
775 European crops: a report from the GEDIFLUX Framework 5 Project", in: *Proceedings  
776 of the 17th EUCARPIA general congress, Tulln, Austria, 8–11 September 2004*, eds.  
777 J. Vollmann, H. Grausgruber & P. Ruckebauer), pp 3–7.
- 778 Shaw, P.D., Graham, M., Kennedy, J., Milne, I., and Marshall, D.F. (2014). Helium:  
779 visualization of large scale plant pedigrees. *BMC Bioinformatics* 15, 259.
- 780 Shorinola, O., Bird, N., Simmonds, J., Berry, S., Henriksson, T., Jack, P., Werner, P., Gerjets,  
781 T., Scholefield, D., Balcarkova, B., Valarik, M., Holdsworth, M.J., Flintham, J., and  
782 Uauy, C. (2016). The wheat Phs-A1 pre-harvest sprouting resistance locus delays the  
783 rate of seed dormancy loss and maps 0.3 cM distal to the PM19 genes in UK  
784 germplasm. *Journal of experimental botany* 67, 4169-4178.
- 785 Simsek, S., Ohm, J.-B., Lu, H., Rugg, M., Berzonsky, W., Alamri, M.S., and Mergoum, M.  
786 (2014). Effect of pre-harvest sprouting on physicochemical properties of starch in  
787 wheat. *Foods* 3, 194-207.
- 788 Smith, S.M., and Maughan, P.J. (2015). SNP genotyping using KASPar assays. *Methods in  
789 molecular biology (Clifton, N.J.)* 1245, 243-256.
- 790 Solovyev, V., Kosarev, P., Seledsov, I., and Vorobyev, D. (2006). Automatic annotation of  
791 eukaryotic genes, pseudogenes and promoters. *Genome biology* 7 Suppl 1, S10 11-  
792 12.
- 793 Torada, A., Ikeguchi, S., and Koike, M. (2005). Mapping and validation of PCR-based  
794 markers associated with a major QTL for seed dormancy in wheat. *Euphytica* 143,  
795 251-255.
- 796 Torada, A., Koike, M., Ikeguchi, S., and Tsutsui, I. (2008). Mapping of a major locus  
797 controlling seed dormancy using backcrossed progenies in wheat (*Triticum aestivum*  
798 L.). *Genome* 51, 426-432.



- 799 Torada, A., Koike, M., Ogawa, T., Takenouchi, Y., Tadamura, K., Wu, J., Matsumoto, T.,  
800 Kawaura, K., and Ogihara, Y. (2016). A Causal Gene for Seed Dormancy on Wheat  
801 Chromosome 4A Encodes a MAP Kinase Kinase. *Current biology : CB* 26, 782-787.  
802 Uauy, C. (2017). Wheat genomics comes of age. *Current Opinion in Plant Biology* 36, 142-  
803 148.  
804 Voss-Fels, K.P., Qian, L., Parra-Londono, S., Uptmoor, R., Frisch, M., Keeble-Gagnère, G.,  
805 Appels, R., and Snowdon, R.J. (2017). Linkage drag constrains the roots of modern  
806 wheat. *Plant, Cell & Environment* 40, 717-725.  
807 Wicker, T., Matthews, D.E., and Keller, B. (2000). TREP: a database for Triticeae repetitive  
808 elements. *Trends in Plant Science* 7, 561-562.  
809 Wingen, L.U., Orford, S., Goram, R., Leverington-Waite, M., Bilham, L., Patsiou, T.S.,  
810 Ambrose, M., Dicks, J., and Griffiths, S. (2014). Establishing the A. E. Watkins  
811 landrace cultivar collection as a resource for systematic gene discovery in bread  
812 wheat. *TAG. Theoretical and applied genetics. Theoretische und angewandte Genetik*  
813 127, 1831-1842.  
814 Xiao-Bo, R., Xiu-Jin, L., Deng-Cai, L., Jia-Li, W., and You-Liang, Z. (2008). Mapping QTLs  
815 for pre-harvest sprouting tolerance on chromosome 2D in a synthetic hexaploid  
816 wheat×common wheat cross. *Journal of applied genetics* 49, 333-341.  
817 Zong, Y., Wang, Y., Li, C., Zhang, R., Chen, K., Ran, Y., Qiu, J.-L., Wang, D., and Gao, C.  
818 (2017). Precise base editing in rice, wheat and maize with a Cas9- cytidine deaminase  
819 fusion. *Nat Biotech* advance online publication.

820

821  
822

## Tables

**Table 1:** *TaMKK3-A* and *PM19* alleles in *Phs-A1* association panel

| Population              | Variety      | Origin  | Status      | <i>TaMKK3-A</i> Allele | <i>PM19-A1</i> promoter InDel | Reference                                    |
|-------------------------|--------------|---------|-------------|------------------------|-------------------------------|----------------------------------------------|
| Alchemy x Robigus       | Alchemy      | UK      | Dormant     | C                      | Insertion                     | Shorinola et al (2016)                       |
|                         | Robigus      | UK      | Non-dormant | A                      | Deletion                      |                                              |
| Option x Claire         | Option       | UK      | Dormant     | C                      | Insertion                     | Shorinola et al (2016)                       |
|                         | Claire       | UK      | Non-dormant | A                      | Deletion                      |                                              |
| MAGIC Population        | Yitpi        | AUS     | Dormant     | C                      | Insertion                     | Barrero et al (2015)                         |
|                         | Baxter       | AUS     | Non-dormant | A                      | Deletion                      |                                              |
|                         | Chara        | AUS     | Non-dormant | A                      | Deletion                      |                                              |
|                         | Westonia     | AUS     | Non-dormant | A                      | Deletion                      |                                              |
| Opata x W7984           | W7984        | MEX     | Dormant     | C                      | Insertion                     | Lohwasser et al, (2013)                      |
|                         | Opata        | MEX     | Non-dormant | A                      | Deletion                      |                                              |
| OS21-5 x Haruyokoi      | OS21-5       | JPN     | Dormant     | C                      | Deletion                      | Torada et al, (2008)                         |
|                         | Haruyokoi    | JPN     | Non-dormant | A                      | Deletion                      |                                              |
| Leader x Haruyokoi      | Leader       | CAN     | Dormant     | C                      | Insertion                     | Torada et al, (2008)                         |
|                         | Haruyokoi    | JPN     | Non-dormant | A                      | Deletion                      |                                              |
| Kitamoe x Münstertaler  | Kitamoe      | JPN     | Dormant     | C                      | Deletion                      | Torada et al, (2005)                         |
|                         | Münstertaler | SUI     | Non-dormant | A                      | Deletion                      |                                              |
| Cranbrook x Halberd     | Halberd      | AUS     | Dormant     | C                      | Insertion                     | Mare et al (2005),<br>Zhang et al (2008)     |
|                         | Cranbrook    | AUS     | Non-dormant | A                      | Deletion                      |                                              |
| Janz x AUS1408          | Aus1408      | AUS, SA | Dormant     | C                      | Insertion                     | Mare et al (2005);<br>Ogbonnaya et al (2007) |
|                         | Janz         | AUS     | Non-dormant | A                      | Deletion                      |                                              |
| SW95-50213 x Cunningham | SW95-50213   | CHN     | Dormant     | C                      | Deletion                      | Mares et al (2005)                           |
|                         | Cunningham   | AUS     | Non-dormant | A                      | Deletion                      |                                              |
| SW95-50213 x AUS1408*   | SW95-50213   | CHN     | Dormant     | C                      | Deletion                      | Mares et al (2005)                           |
|                         | Aus1408      | AUS, SA | Dormant     | C                      | Insertion                     |                                              |
| Boxer x Soleil          | Soleil       | UK      | Dormant     | C                      | Insertion                     | Flintham (2000)                              |
|                         | Boxer        | UK      | Non-dormant | A                      | Deletion                      |                                              |

823 \**Phs-A1* was not detected in this population as the DH lines were generally dormant. However, limited number of lines showed transgressive  
824 segregation relative to the dormant phenotypes of the two parents.

825 **Table 2.** Mean Coefficient of Parentage (COP) within Australian and UK  
826 germplasm, and between groups of the most prevalent haplotypes containing  
827 dormant (C) and non-dormant (A) SNPs at *TaMKK3-A*.

| Germplasm | Haplotype | <i>TaMKK3-A</i> SNP | Mean COP | Comparisons (n) |
|-----------|-----------|---------------------|----------|-----------------|
| Australia | All       | A/C                 | 0.10     | 13530           |
| Australia | H5/H7     | C                   | 0.17     | 350             |
| Australia | H1/H2     | A                   | 0.15     | 2700            |
| UK        | All       | A/C                 | 0.11     | 1596            |
| UK        | H12       | C                   | 0.20     | 496             |
| UK        | H3        | A                   | 0.21     | 55              |

828

829 **Figure Legends:**

830

831 **Figure 1:** Physical map of the *Phs1-A1* interval in bread wheat Chinese Spring (CS)  
832 and wild emmer (Zavitan). (A) *Phs1-A1* interval in CS is covered by two non-  
833 overlapping BAC clusters: Cluster 285 (4 BACs) and Cluster 16421 (11 BACs). BACs  
834 are represented by solid lines while genes found on the BAC are represented by filled  
835 ovals. The proposed candidate genes for *Phs-A1* are in red font. (B) Whole genome  
836 assembly of Zavitan wild emmer across the *Phs1-A1* interval. Genes present in both  
837 assemblies are joined by dotted lines.

838

839 **Figure 2:** Marker development and allele distribution of *MKK3-A* in ancestral and  
840 historic germplasm. (A) Genotype plot of varieties and a F<sub>3</sub> population segregating for  
841 *Phs-A1* using the *TaMKK3-A* KASP assay. (B) Development of co-dominant CAPS  
842 marker based on *Hpy166II* restriction digest of the C660A SNP. Non-dormant  
843 varieties Robigus (R) and Clare (C); dormant varieties Alchemy (A) and Option (O).  
844 (C) Allele frequency of the causal C660A SNP in *T. urartu* and *T. turgidum* ssp.  
845 *dicoccoides* accessions and the Watkins and Gediflux collections. The number of lines  
846 genotyped in each germplasm set is in parenthesis. (D) *TaMKK3-A* allele distribution  
847 in the four wheat end-use groups (nabim 1-4) in the UK.

848

849 **Figure 3:** *Phs-A1* haplotype analysis. (A) Structure of 14 haplotypes identified in the  
850 HapMap population across 39 SNP loci in the *Phs-A1* interval. SNP loci are ordered  
851 based on their physical position on the Zavitan assembly. Exons, intron and intergenic  
852 regions are represented by filled boxes, solid lines and breaks, respectively. Note that  
853 *ERF-C* is not on the Zavitan assembly. (B) Haplotype network of the 14 haplotypes.  
854 The size of each circle corresponds to the number of lines in each haplotype. Blue,  
855 light blue, amber and red represent cultivars, landraces, breeding and synthetic line in  
856 each haplotype, respectively. (C) Geographical distribution of the four *TaMKK3-A*  
857 haplotypes. The size of the circle represents the sample size obtained within each  
858 country while each section represents the proportion of the country sample size with  
859 the specified haplotype.

860

861 **Figure 4:** Relationship between the European, UK, Australian and HapMap *Phs-A1*  
862 Haplotypes. The distribution (bar charts) of the HapMap and unique haplotypes found  
863 in the Gediflux (European), UK and Australian germplasm using genotype  
864 information of seven of the 39 HapMap SNPs within the *Phs-A1* interval.

865

866 **Figure 5:** Pedigree of selected UK and European varieties highlighting the origin of  
867 the major resistant haplotype (H12). Each circle represents a variety and colours  
868 represent the different haplotypes. Nodes are size based on the number of varieties  
869 derived from the node.

870 **Supplemental files:**

871

872 A single excel document includes the following supplemental tables as individual  
873 spreadsheets.

874

875 **Table S1:** BAC, Sequence and gene content information for the BAC cluster in *Phs-*  
876 *A1* interval.

877 **Table S2:** *TaMKK3-A* Alleles of cultivars in the Watkins collection.

878 **Table S3:** Classification of HapMap lines according to *Phs-A1* haplotypes.

879 **Table S4:** KASP markers designed for haplotype analysis of *Phs-A1* interval.

880 **Table S5:** Haplotype map of the Gediflux Collection

881 **Table S6:** Haplotype map of Australian germplasm

882

883 **Figure S1:** Pedigree of UK and European varieties with their corresponding *Phs-A1*  
884 haplotype status. Each circle represents a variety and the colours represent the different  
885 haplotypes.

886

887 **Figure S2:** Pedigree of UK and European varieties with their corresponding *TaMKK3-*  
888 *A* allele. Each circle represents a variety and the colours represent the different  
889 haplotypes.

890

891 **Figure S3:** Pedigree of Australian varieties with their corresponding *Phs-A1* haplotype  
892 status. Each circle represents a variety and the colours represent the different  
893 haplotypes.

894

895 **Figure S4:** Pedigree of Australian varieties with their corresponding *TaMKK3-A*  
896 allele. Each circle represents a variety and the colours represent the different  
897 haplotypes.

898

899 **Figure S5:** Comparison of syntenic *Phs-A1* physical maps and contigs in  
900 *Brachypodium*, wheat and barley. Genes in the homologous intervals in *Brachypodium*  
901 (amber line), wheat (black lines) and barley (grey line) are compared against each  
902 other. Orthologous genes across genomes are joined by lines. The region of high  
903 conservation is indicated with grey background while the region of low conservation  
904 has plain background.

**(A)**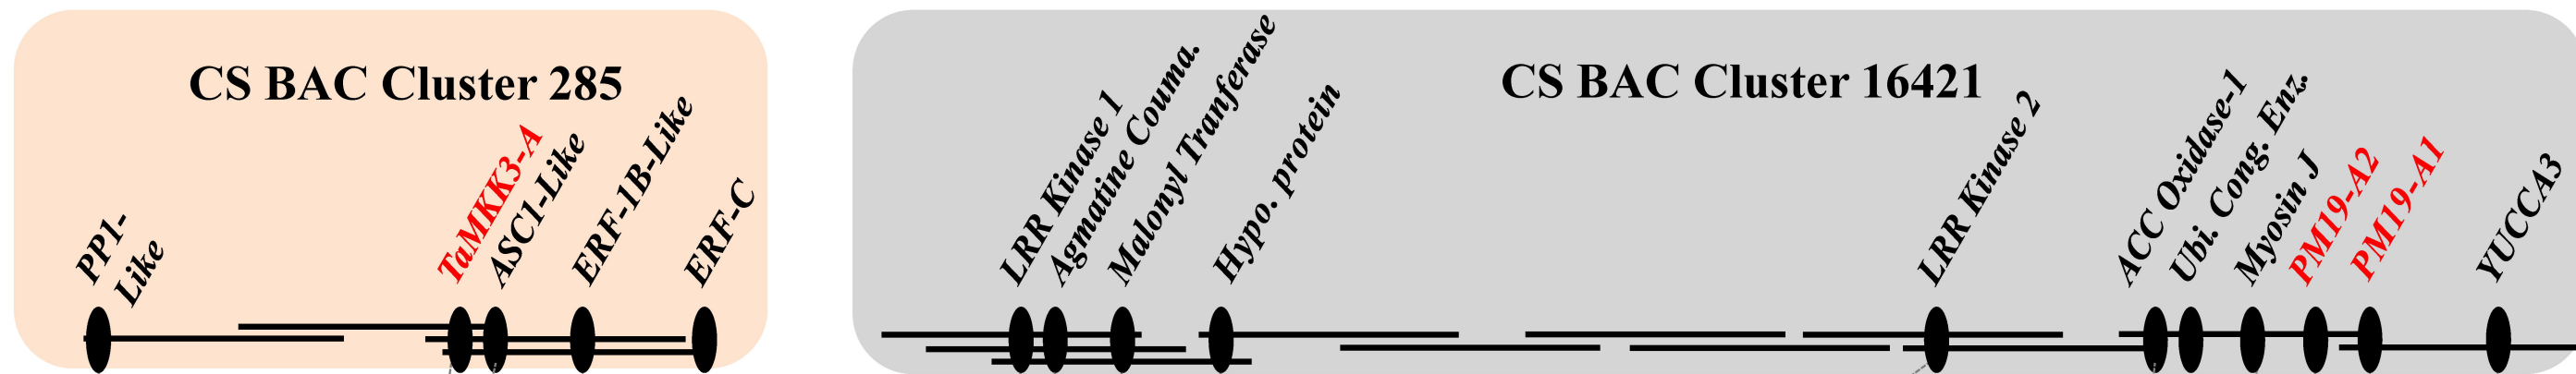**(B)**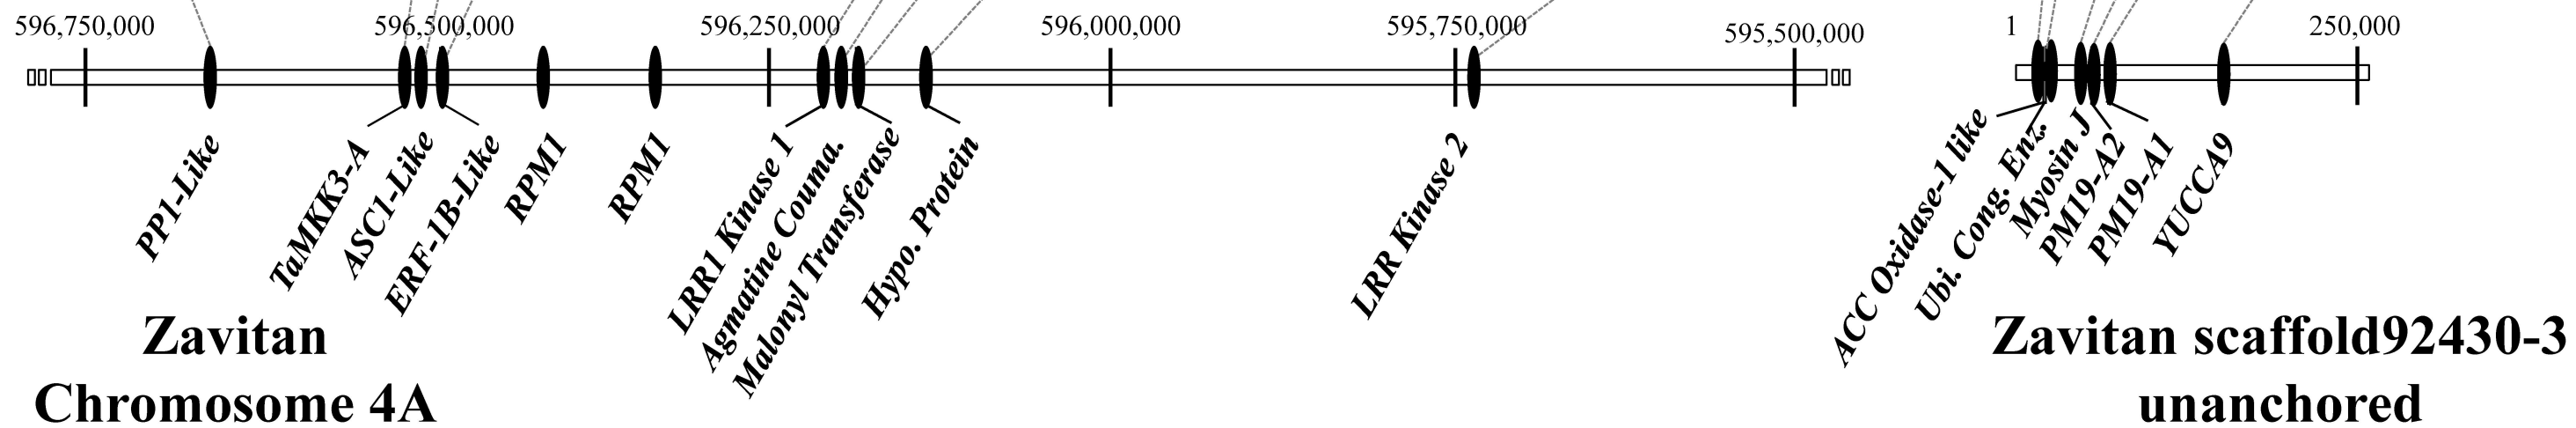

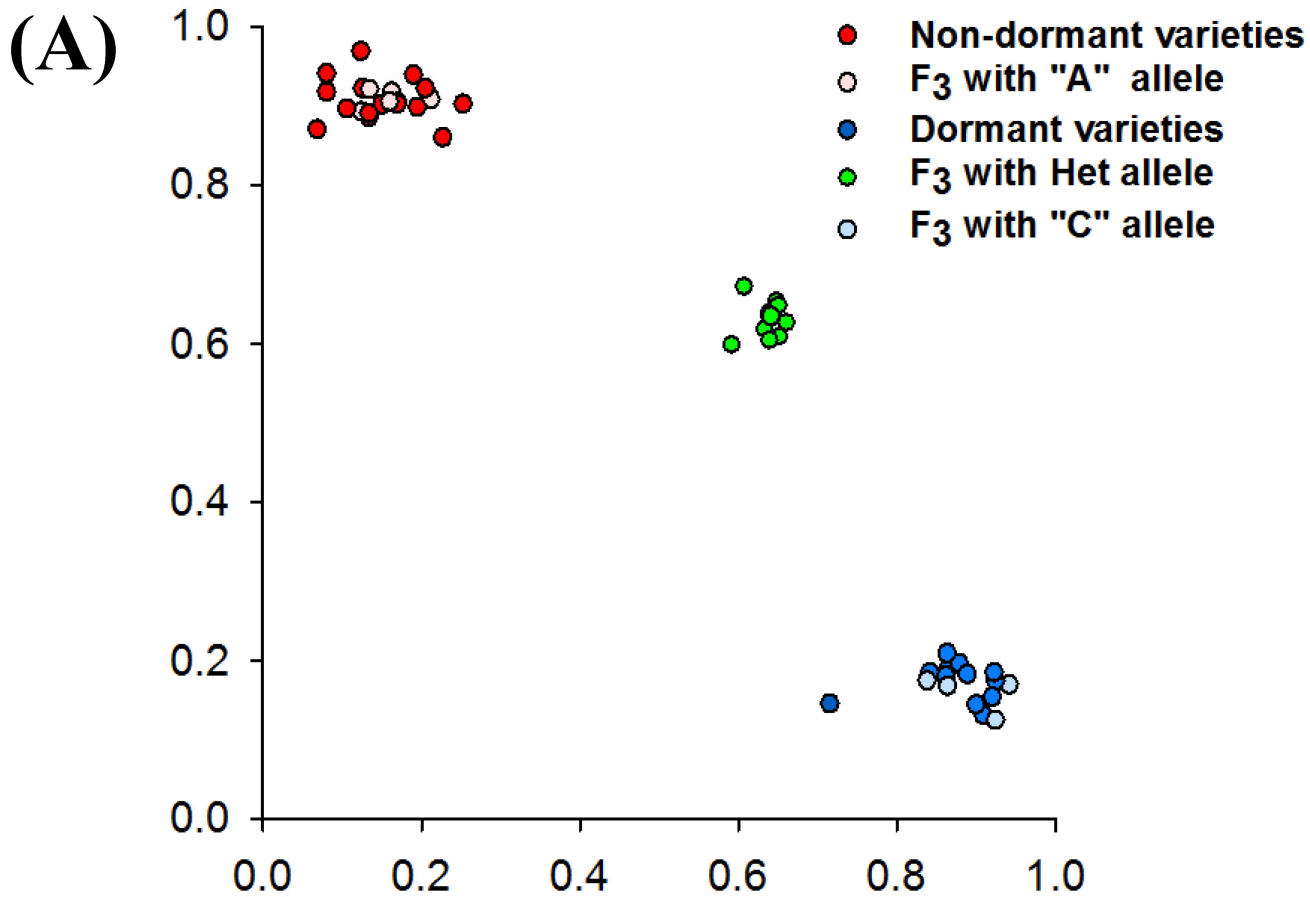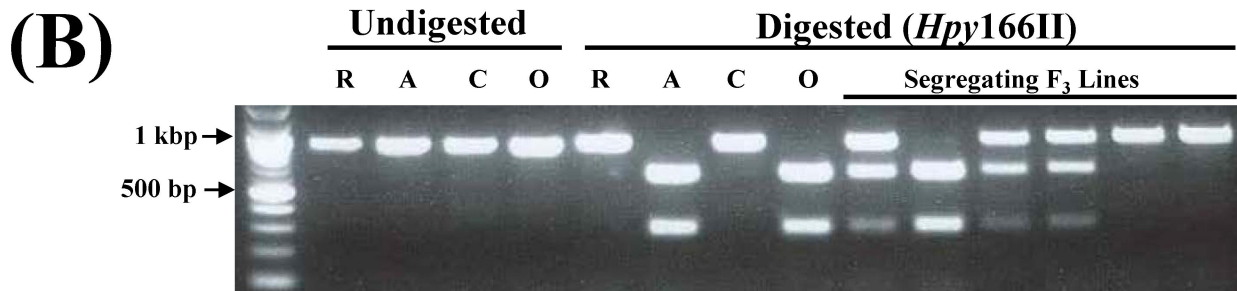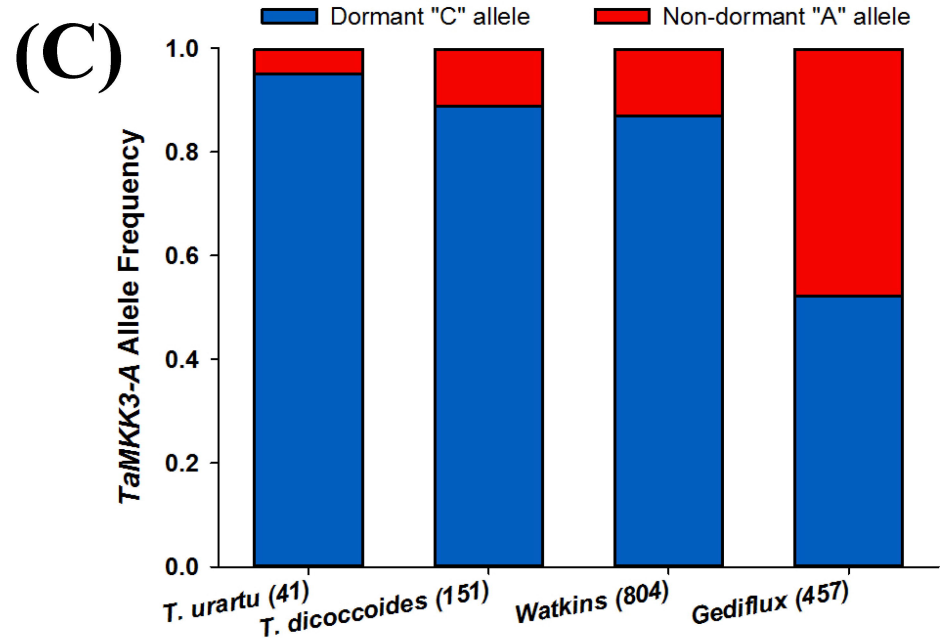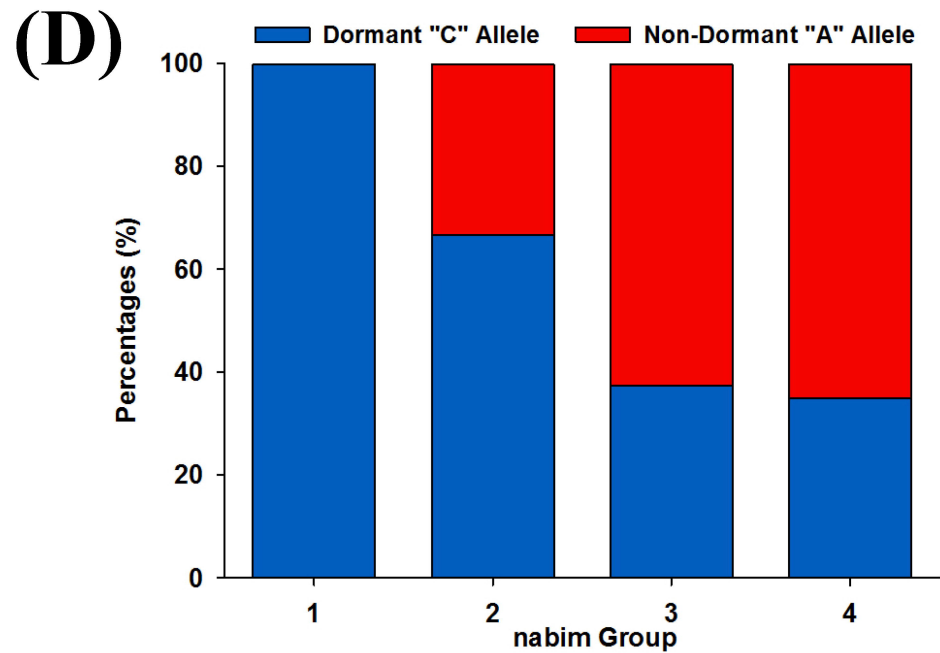



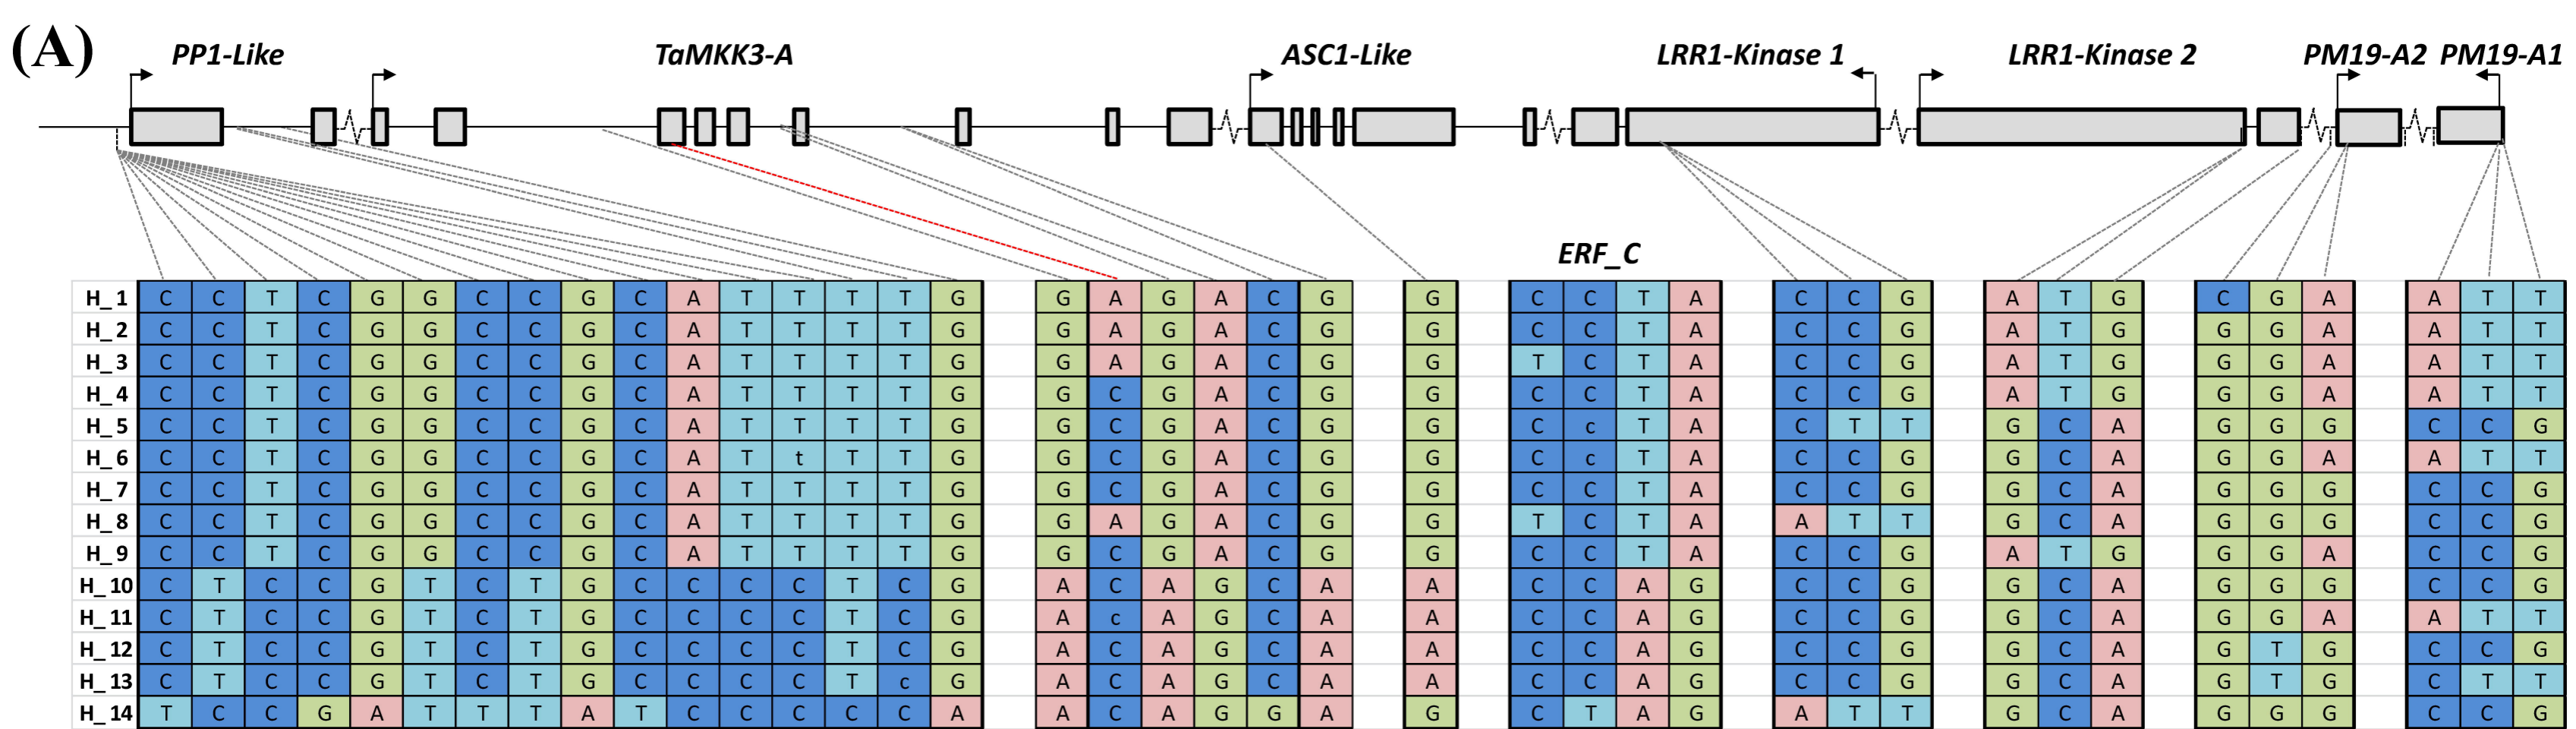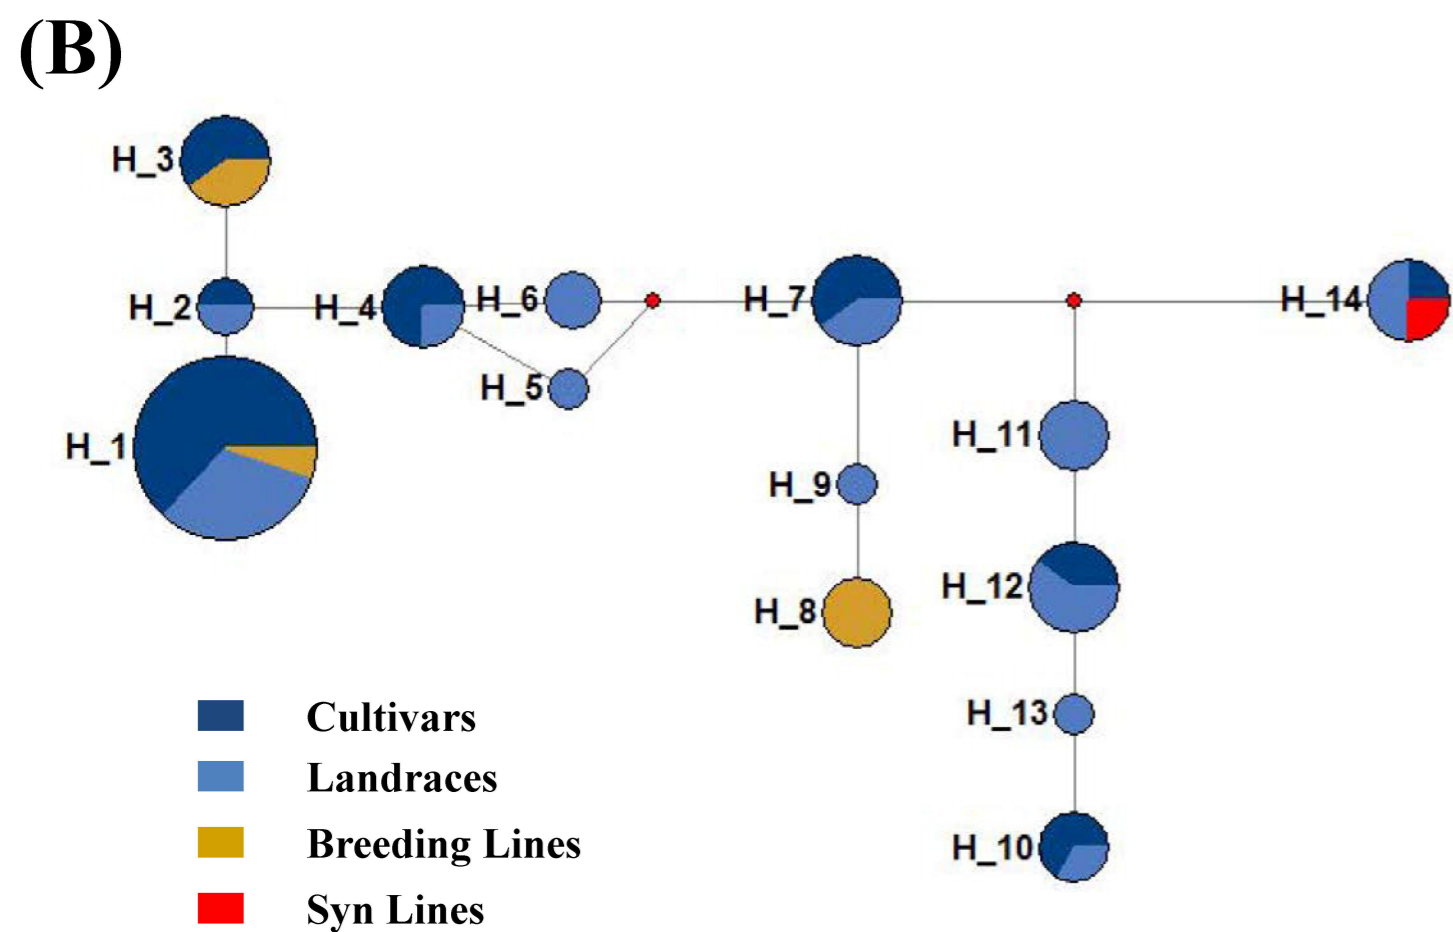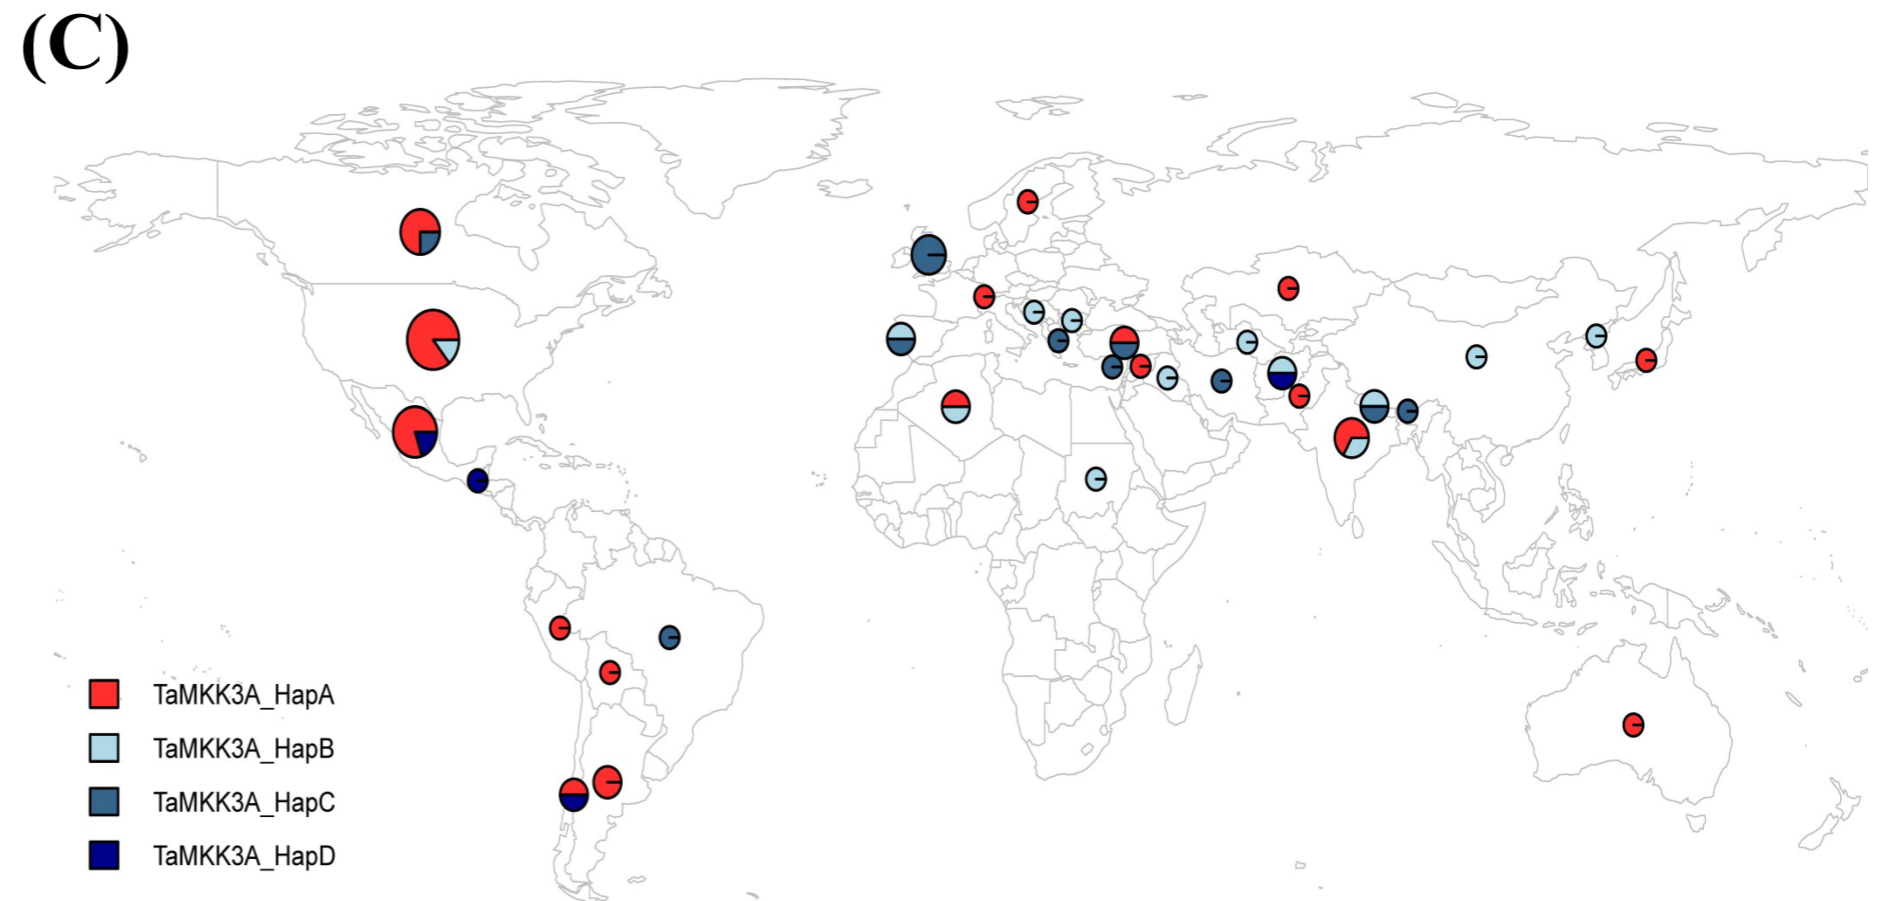

IWGS Contig (SNP position)

4AL\_7159962 (713)  
**4AL\_3844919 (137)**  
 4AL\_5621077 (266)  
 4AL\_7064804 (6018)  
 4AL\_7158475 (4203)  
 4AL\_7174272 (20841)  
 4AL\_7123764 (2216)

■ Dormant ■ Non-Dormant

|                |   |   |   |   |   |   |   |
|----------------|---|---|---|---|---|---|---|
| H1/H2          | T | A | G | C | G | G | T |
| H3             | T | A | G | T | G | G | T |
| H4             | T | C | G | C | G | G | T |
| H5/H7          | T | C | G | C | A | G | C |
| H6             | T | C | G | C | A | G | T |
| H8             | T | A | G | T | A | G | C |
| H9             | C | C | G | C | G | G | C |
| H10            | C | C | A | C | A | G | C |
| H11            | C | C | A | C | A | G | T |
| H12            | C | C | G | C | A | G | C |
| H13            | C | C | A | C | A | T | C |
| H14            | C | C | A | C | A | T | T |
| New Gediflux 1 | T | A | G | C | G | T | C |
| New Gediflux 2 | T | A | G | C | A | G | C |
| New Gediflux 3 | T | C | A | C | A | G | C |
| New Gediflux 4 | T | A | G | C | G | G | T |
| New Gediflux 5 | C | A | G | C | G | G | C |
| New Aus 1      | T | A | A | C | G | G | T |
| New Aus 2      | C | C |   | C | G | G | T |

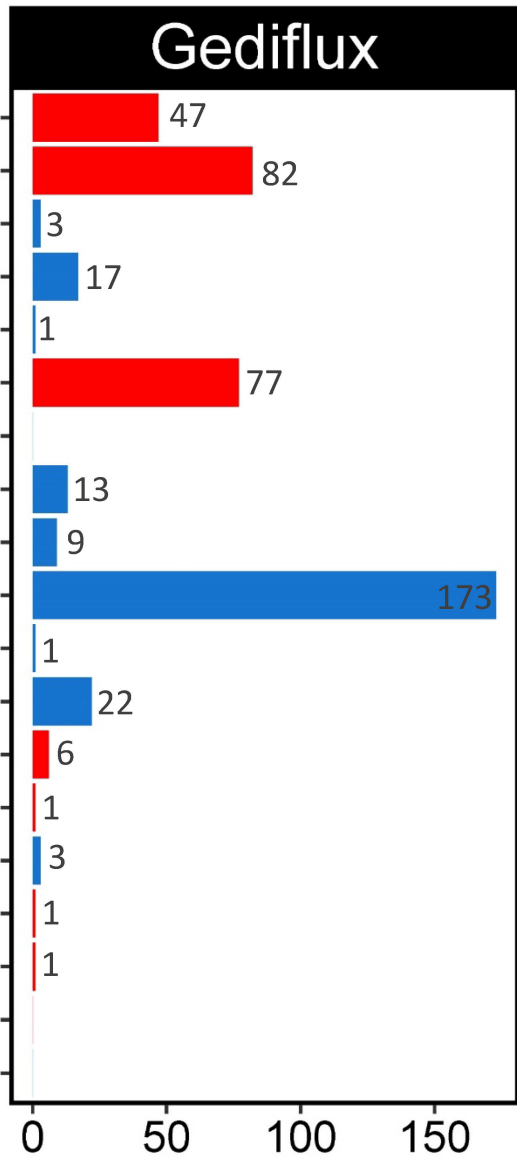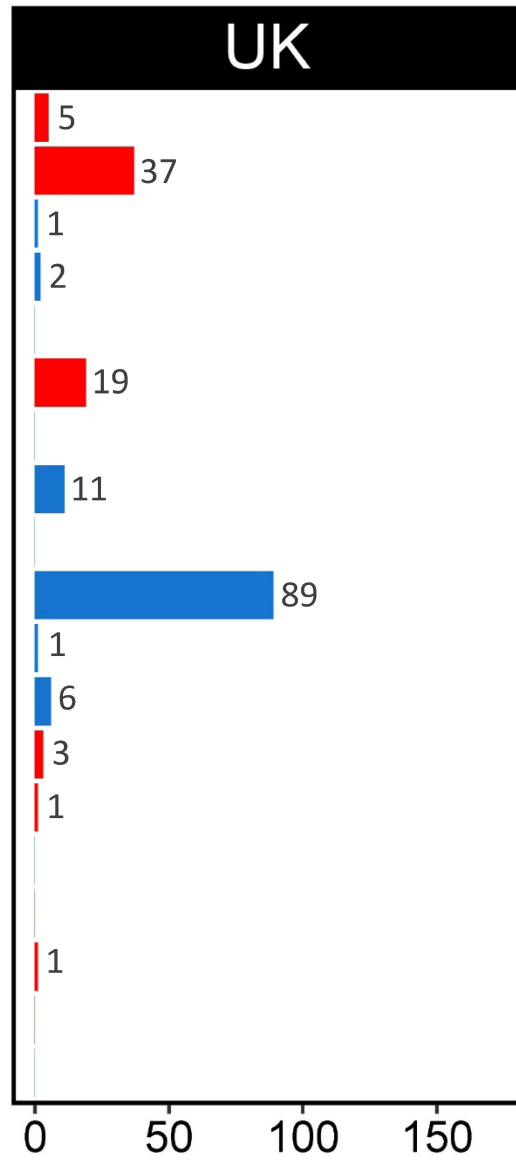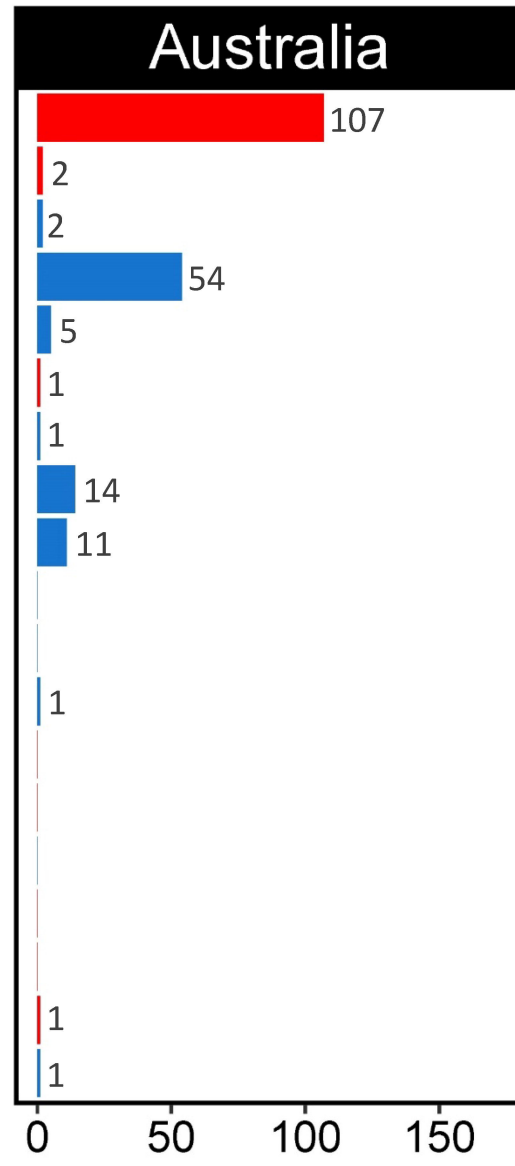

Number of Lines

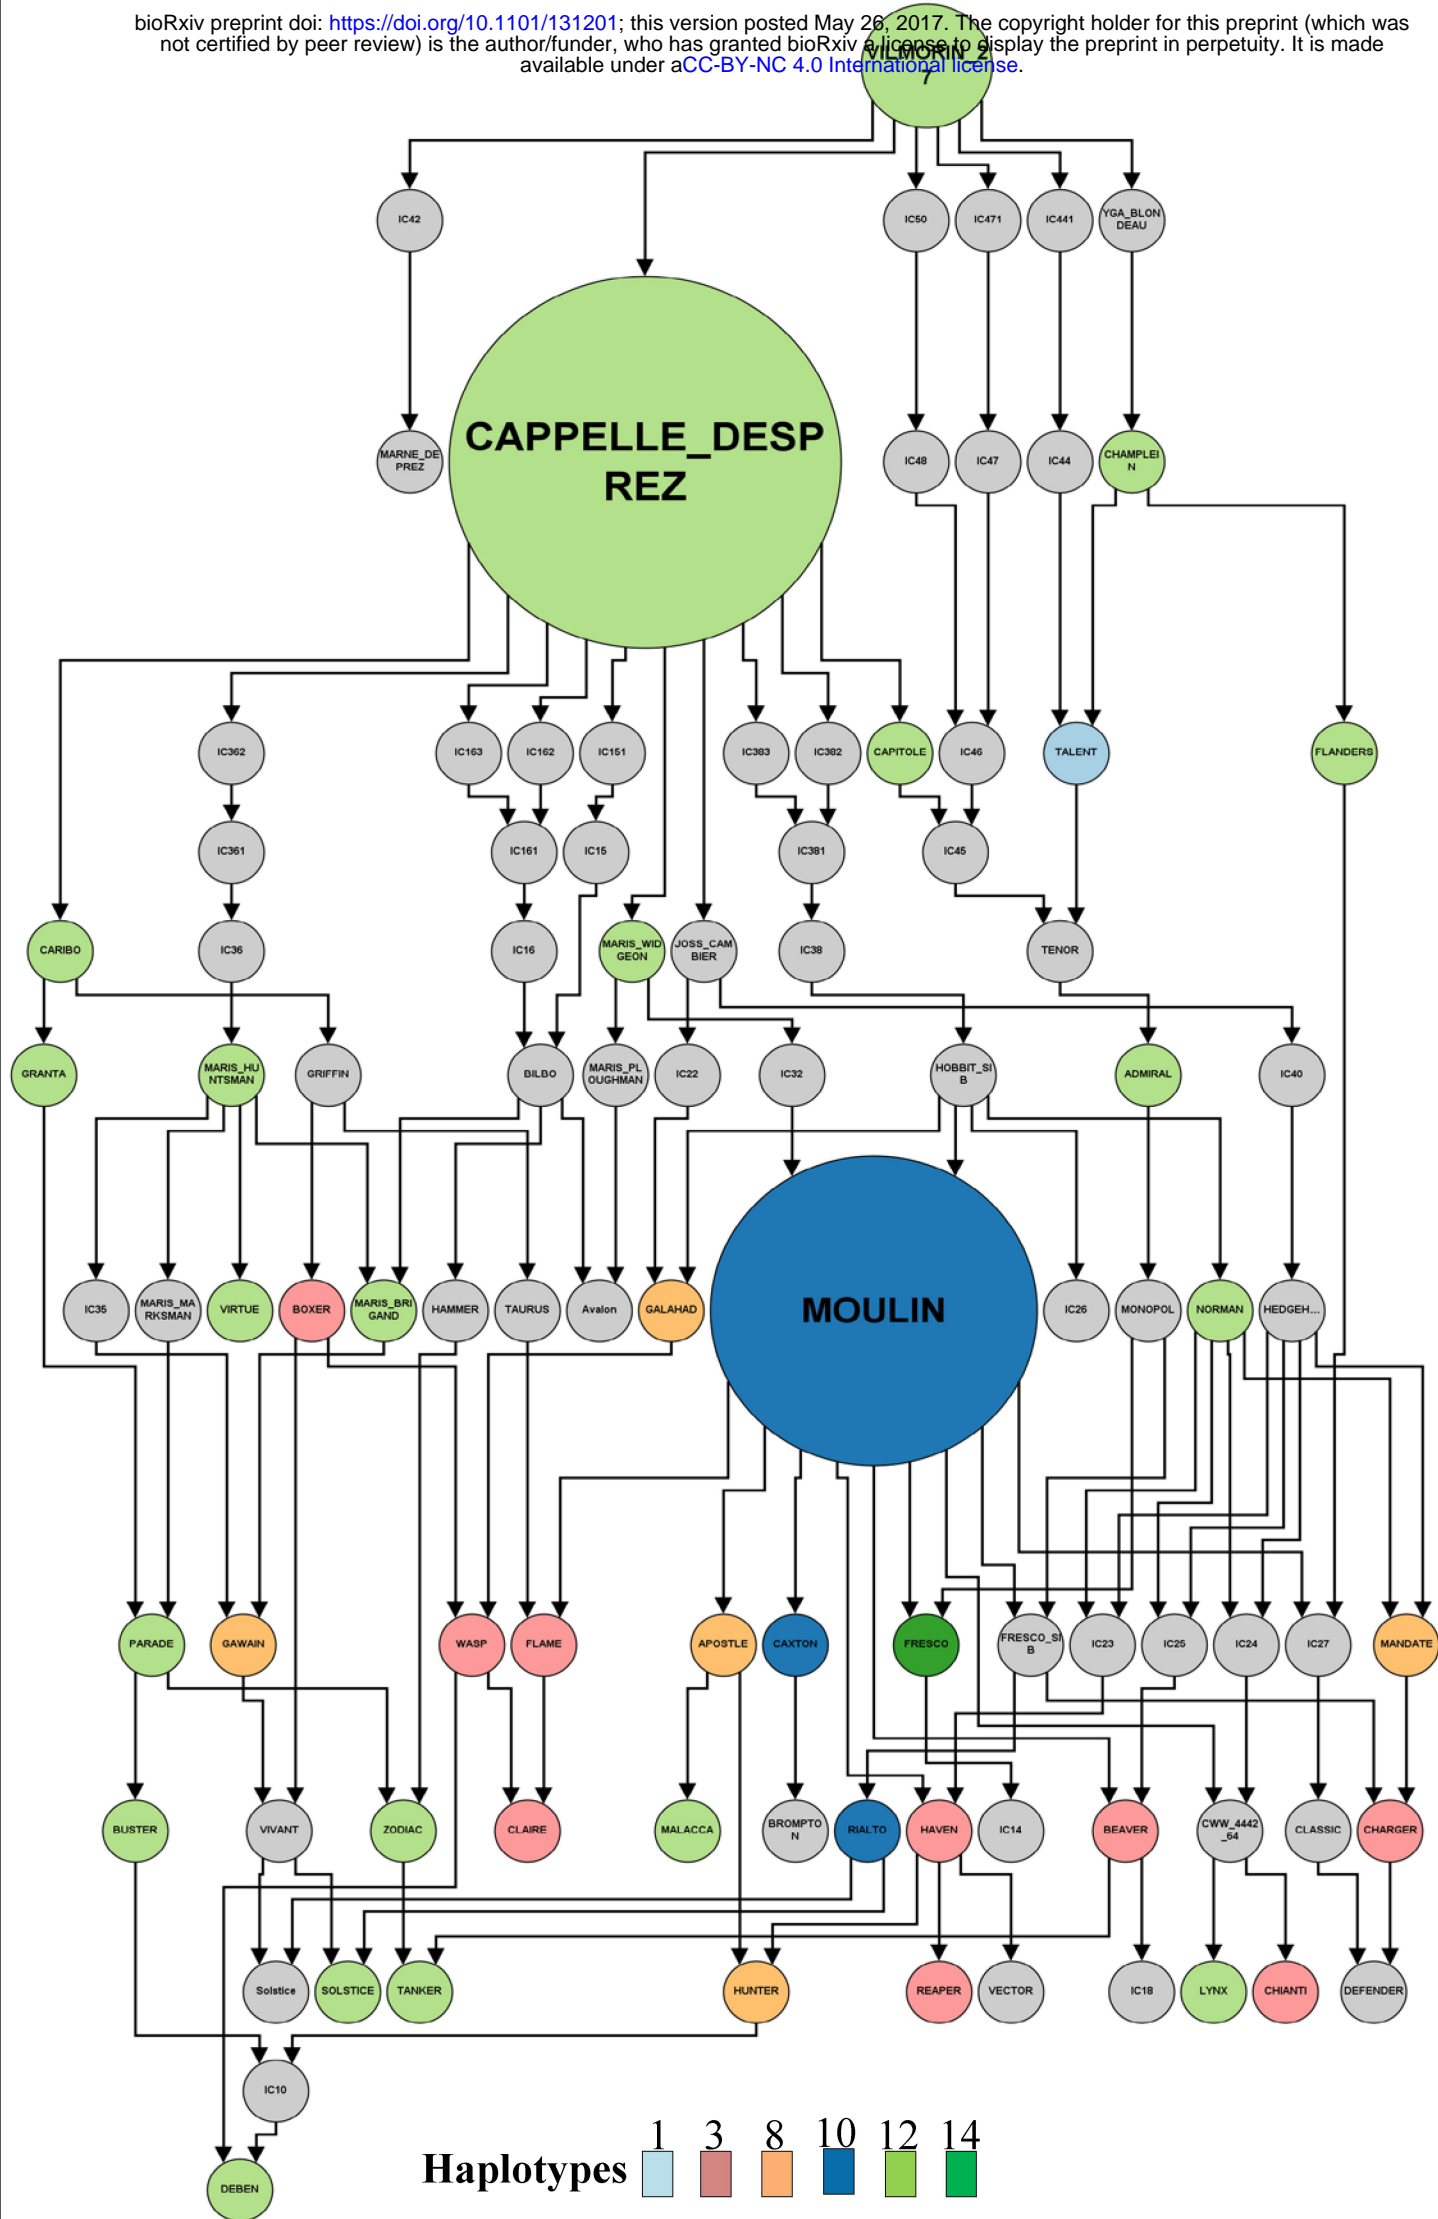

Source: https://www.biorxiv.org/content/10.1101/131201v2.full.pdf
